1 Larval mannitol diets increase mortality, prolong development,  
2 and decrease adult body sizes in fruit flies (*Drosophila*  
3 *melanogaster*)

4  
5  
6

7 Meghan Barrett<sup>1¶</sup>, Katherine Fiocca<sup>1¶</sup>, Edward A. Waddell<sup>1</sup>, Cheyenne McNair<sup>2</sup>, Sean  
8 O'Donnell<sup>1, 2&</sup>, and Daniel R. Marena<sup>1, 3&\*</sup>

9

10 <sup>1</sup>Department of Biology Drexel University, Philadelphia, PA, USA

11 <sup>2</sup>Department of Biodiversity, Earth and Environmental Science, Drexel University, Philadelphia,  
12 PA, USA

13 <sup>3</sup>Department of Neurobiology and Anatomy, Drexel University College of Medicine,  
14 Philadelphia, PA

15

16 \*Correspondence author

17 Email: [dm562@drexel.edu](mailto:dm562@drexel.edu) (DRM)

18

19 ¶ These authors contributed equally to this work.

20 & These authors also contributed equally to this work.

21

## 22 **Abstract**

23 Ingestion of the polyol mannitol caused sex-biased mortality in adult *Drosophila melanogaster*,  
24 but larval mortality was not sex-biased. High-sugar diets prolong development and generate  
25 smaller adult body sizes in *D. melanogaster*. We hypothesized that mannitol ingestion would  
26 generate similar developmental phenotypes as other high-carbohydrate diets. We predicted  
27 concentration-dependent effects on development similar to high-sugar diets when *D.*  
28 *melanogaster* larvae are fed mannitol, as well as a concentration-dependent amelioration of  
29 developmental effects if introduction to mannitol media is delayed past the third instar. Both  
30 male and female larvae had prolonged development and smaller adult body sizes when fed  
31 increasing concentrations of mannitol. Mannitol-induced increases in mortality were  
32 concentration dependent in 0 M to 0.8 M treatments beginning as early as 48 hours post-  
33 hatching. Larval survival, and pupation and eclosion times, were normal in 0.4 M mannitol  
34 treatments when larvae were first introduced to mannitol 72 hours post-hatching (the beginning  
35 of the third-instar); the adverse mannitol effects occurred in 0.8 M mannitol treatments, but at a  
36 lower magnitude. Female *D. melanogaster* adults prefer laying eggs on diets with high sugar  
37 concentrations, despite the negative effects on offspring performance. However, when given a  
38 choice, female *D. melanogaster* avoided laying eggs on mannitol-containing media that was  
39 otherwise identical to the control media, suggesting females perceived and avoided mannitol. In  
40 conclusion, the developmental effects of a larval mannitol diet closely resemble those of high-  
41 sugar diets, but adult female oviposition responses to mannitol in laying substrates are distinct  
42 from responses to other carbohydrates.

43

## 44 **Introduction**

45           Developmental duration and body size are controlled by three related variables in  
46 holometabolous insects: growth rate, critical weight (the point at which the developmental period  
47 is no longer affected by resource levels), and the interval to the cessation of growth [1,2].

48 Because they are controlled by the same three parameters, a direct, positive relationship is  
49 expected and typically observed between developmental duration and body size [3–8].

50           However, some environmental variables can differently affect growth rate, critical  
51 weight, and interval to the cessation of growth, causing neutral or even negative relationships to  
52 occur between body size and development time [2,4]. High-carbohydrate diets, specifically  
53 sucrose and glucose, affect insect growth and development. High-sugar diets disrupt the  
54 insulin/TOR signaling pathway through increased circulating trehalose levels [9,10]. High-sugar  
55 fed *D. melanogaster* adults are a model system for studying metabolic phenotypes associated  
56 with insulin resistance and diabetes [9–15]. At the larval stage, high-sugar diets lead to delays in  
57 adult eclosion (due to delayed onset of pupation, but not prolonged pupation periods), reduced  
58 survival, and smaller pupal case volumes and lower adult dry mass [10,16–19].

59           Mannitol, a non-sugar polyol carbohydrate, prolonged development when fed to *D.*  
60 *melanogaster* larvae [20], and larvae fed mannitol were smaller than control larvae of the same  
61 age (Fiocca and Barrett, personal observation). Mannitol is a sugar alcohol and isomer of  
62 sorbitol. It is produced naturally as a product of fermentation and is found commonly in plants,  
63 bacteria, and fungi [21–23]. Mannitol is used as a low-calorie sweetener, sweetening foods  
64 without increasing blood glucose levels or insulin in humans [24,25]. However, ingestion and  
65 breakdown of mannitol by *Tribolium castaneum* beetles increased hemolymph trehalose levels,

66 indicating mannitol may be a nutritive source of dietary carbohydrates in some insect taxa  
67 [26,27]. We hypothesized that mannitol ingestion during *D. melanogaster* development would  
68 generate phenotypes similar to those produced by high sugar diets [10,17,18]. The ability of  
69 polyols to disrupt development has not been studied, and identifying additional compounds that  
70 affect insect development can further our understanding of the pathways that connect growth  
71 rate, developmental timing, and body size in insects.

72         The timing of high-carbohydrate diet introduction to larvae is important in determining  
73 its effects, particularly pre- and post-critical weight [10,28]. Third instar larvae fed a high-sugar  
74 diet showed lower transcriptional changes in the expression of genes associated with glucose  
75 transport and metabolism, lipid synthesis and storage, trehalose synthesis and stability, and  
76 oxidative stress when compared to first instar larvae continuously fed sucrose [10]. We  
77 hypothesized that delaying mannitol introduction to larvae until the third instar would reduce the  
78 severity of mannitol's developmental effects in larvae fed high molarity mannitol media.

79         Female *D. melanogaster* choose high-carbohydrate (sucrose) oviposition sites, even when  
80 these sites detrimentally affect the fitness of their offspring [16]. However not all carbohydrates  
81 induce this same response; notably, high-carbohydrate erythritol substrates did not affect  
82 oviposition choice compared to lower-carbohydrate substrates [29]. The impact of mannitol,  
83 found in both fresh and rotting fruits due to microbial fermentation, on oviposition choice has not  
84 been explored [23,30].

85         In this study, we quantified the effect of mannitol feeding as a larva on adult body size,  
86 measured by thorax length. We assessed the effects of increasing concentrations of dietary  
87 mannitol on *D. melanogaster* larval survival, and pupation and eclosion times. We analyzed if  
88 developmental delays were due to a delay in the onset of pupation, and/or prolonged time in the

89 pupal stage. We also evaluated if delaying mannitol introduction to larvae by 72 hours, or  
90 approximately the early third instar [31], could reduce or eliminate the developmental effects of  
91 decreased survival and prolonged developmental duration. We assessed if adult females differed  
92 in the preference for control vs. mannitol media for oviposition sites. Mannitol ingestion during  
93 the larval stage is a rare example of environmental substrate variation that can decouple the  
94 typical positive relationship between development duration and body size; the effects were  
95 concentration-dependent and developmental stage-dependent. We discuss the similarities  
96 between larval mannitol diets and high-sugar diets, and hypothesize that the insulin signaling  
97 pathway is a possible mechanism for mannitol's developmental effects.

## 98 **Methods and materials**

### 99 **Culturing *Drosophila***

100 Wild-type (Canton S) *D. melanogaster* (Bloomington *Drosophila* Stock Center) were raised to  
101 adulthood on standard *Drosophila* media for laboratory culturing and reared in an insect growth  
102 chamber at 27.5 °C, 50 % relative humidity, with a 12-h:12-h photoperiod [32]. These conditions  
103 were used to rear adults and for all larval experiments. Standard media was prepared in 100 ml  
104 batches as follows: 9.4 g cornmeal, 3.77 g yeast, 0.71 g agar, 0.746 ml Propionic acid, 1.884 ml  
105 Tegosept (10 % w/v methyl p-hydroxybenzoate in 95 % ethanol), and 9.42 ml molasses  
106 (Genesee Scientific). The appropriate amount of mannitol (HiMedia; GRM024-500G, Lot  
107 000249743) was added, and beakers were filled with distilled water to a final volume of 100 ml.  
108 After heating the mixed ingredients to set the agar, media was poured into vials and cooled until  
109 consistency was firm and uniform. An excess of media was provided, with 10 ml in each vial.

## 110 **Testing effect of larval mannitol feeding on adult body size**

111 Groups of 15 male and 15 female wild-type flies raised on standard media were placed in vials  
112 containing 0 M, 0.4 M, or 0.8M mannitol adult media (standard media recipe with no molasses)  
113 and allowed to lay for 24 hours (at which time they were removed). Nine vials were used per  
114 concentration, with a total of 405 flies of each sex. Vials were checked for newly emerged adults  
115 every twelve hours from Day 10 to Day 15, and every twenty-four hours from Day 15 to Day 24  
116 (the last day that a larva pupated in the larval plate trials). Adult flies were removed from the  
117 vials and sexed; two males and two females were randomly selected every 24 hours from each  
118 vial with adults. Selected adults were sacrificed and photographed for body size measurements  
119 (0M: n= 52 females, n= 56 males; 0.4M: n= 66 females, n= 61 males; 0.8M: n= 50 females, n=  
120 49 males). Photographs of the thorax were taken from a dorsal view at 4 X magnification using a  
121 digital camera mounted (0.7 X) on a dissecting scope. Measurements of thorax length were taken  
122 from the tip of the scutellum to the most anterior part of the mesothorax [33,34] in ImageJ using  
123 the ruler tool [35], and photographs of a stage micrometer were used to convert pixels to mm.

## 124 **Testing effects of dietary mannitol on larval mortality and** 125 **developmental delay**

126 Translucent media was produced by omitting the cornmeal from the standard media recipe and  
127 lowering the amount of agar to 0.52 g/100 ml [29]. Food was poured to a depth of 3 mm in 50  
128 mm diameter petri dishes, allowing for the observation of the larvae in the food. Groups of over  
129 100 mixed male and female wild-type flies raised on standard media were placed in each of 10  
130 egg laying chambers. At the end of four hours, eggs were collected and five eggs were plated per  
131 petri dish, with mannitol concentrations from 0 to 0.8 M, at 0.2 M increments. Six petri dishes

132 were used per concentration (n=30 eggs/concentration). Egg hatching, mortality, pupation, and  
133 eclosion were assessed every 24 hours for 27 days using the methods detailed in [29]. Mean  
134 pr(mortality), days to pupation, and days to eclosion were calculated for each concentration and a  
135 three-parameter sigmoid curve was fitted to the data to assess  $LC_{50}$  prior to eclosion.

## 136 **Testing for a change in severity of mannitol's developmental effects** 137 **when delaying introduction to larvae by 72 hours**

138 Groups of approximately 100 mixed male and female wild-type flies raised on standard media  
139 were placed in each of 10 egg laying chambers. At the end of four hours, eggs were collected and  
140 plated on 0M control translucent media where they were raised for 72 hours. After 72 hours, five  
141 larvae were plated per treatment petri dish (using translucent media), with the mannitol  
142 concentrations from 0 to 0.8 M, at 0.4 M increments. Six petri dishes were used per  
143 concentration (n=30 eggs/concentration). Larval mortality, pupation, and eclosion were assessed  
144 every 24 hours for another 22 days. Mean percent mortality, days to pupation, and days to  
145 eclosion were calculated for each concentration.

## 146 **Testing effects of mannitol on oviposition choice**

147 An oviposition choice test [29] was used to assess differences in egg laying choice between  
148 control and 0.5M mannitol media (control media, with the addition of mannitol). Groups of ten,  
149 0-24 hour old adult male and ten, 0-24 hour old female flies were reared on standard media for  
150 72 hours before being transferred to choice arenas. The arenas consisted of two vials on their  
151 sides, one containing control media and the other containing 0.5 M mannitol media, connected  
152 by a plug with a 1.5 cm diameter central tube. Flies were observed moving freely between vials.

153 Six treatment arenas contained a choice between 0.5 M and 0 M mannitol, while six control  
154 arenas contained a choice between two 0 M mannitol media.  
155 After 72 hours on standard media, 10 male and 10 female flies were transferred to the paired vial  
156 set-ups, with 5 female and 5 male flies placed on either side of the plug. Flies were moved to a  
157 new media arena every 24 hours and eggs laid on each media were counted daily for three days  
158 (n=7,120 eggs). Vial orientation within the incubator was rotated once per day.

## 159 **Statistical analyses**

160 Analyses were performed using SPSS v. 24, Sigmaplot v 12.5, and Graphpad v. 8.0.0 [36–38].  
161 The effects of mannitol introduction to larvae on adult body size were analyzed using Kruskal-  
162 Wallis test with Dunn’s multiple corrections for each sex. A 2-way ANOVA was used to look  
163 for an interaction effect between sex and mannitol concentration on body size. A linear  
164 regression was fitted to the data for each sex across concentrations, and the slopes and intercepts  
165 were compared in Graphpad to assess if sexes differed in body size and in the degree of  
166 mannitol’s effect on their body size.

167 Effects of eclosion day on male or female body size within a concentration were assessed using  
168 linear regressions in GraphPad, to understand the effects of mannitol in individuals that are more  
169 or less delayed in their development within a concentration and sex. This allowed us to look for  
170 any effect of day-based sampling bias, as we did not measure every emerging adult’s body size,  
171 but only two per day of each sex in each vial. There was no significant trend within each pair of  
172 concentration and sex (e.g. 0 M + females) of emergence day on body size, except in 0.4 M  
173 males, indicating that flies emerging earlier and later within a concentration were not differently  
174 affected by mannitol and reducing the likelihood of day-based sampling bias on our results (S1



175 Fig; 0 M-female,  $F=0.47$ ,  $p=0.50$ ; 0 M-male,  $F=3.52$ ,  $p=0.07$ ; 0.4 M-f,  $F=0.80$ ,  $p=0.37$ ; 0.4 M-m,  
176  $F=10.51$ ,  $p=0.002$ ; 0.8 M-f,  $F=0.16$ ,  $p=0.69$ ; 0.8 M-m,  $F= 2.00$ ,  $p=0.16$ ). The slopes of the  
177 regressions across all six concentration-sex pairs were not significantly different from one  
178 another ( $F=0.53$ ,  $p=0.75$ ).

179 Larval mortality data across mannitol concentrations at 48 hours, 72 hours, and pre-eclosion was  
180 assessed using survival analyses in SPSS [39], with subjects living to the end of the trial or  
181 eclosed included in the analysis as right-censored values on the final day of that test (48 hours,  
182 72 hours, and the last day of the trial respectively). Pupae that had not eclosed after at least six  
183 days at the end of the trial were marked as ‘dead’ on the final day of the trial (day 27).

184 Differences in survival distributions across concentrations were tested using pairwise log-rank  
185 Mantel Cox tests. Three-parameter, best-fit sigmoidal function  $LC_{50}$  curves for larvae at 72  
186 hours, pre-pupation, and pre-eclosion were generated in Sigmaplot. To analyze any effects on  
187 survival of delaying the introduction of mannitol to larvae by 72 hours, we used a pairwise log-  
188 rank Mantel Cox test (with subjects eclosed before the end of the trial included as right-censored  
189 values on day 25, and pupae that had not eclosed marked as ‘dead’ on the final day).

190 To analyze developmental delays across concentrations, we used a one-way ANOVA with  
191 Tukey’s multiple comparisons test in Graphpad. To analyze differences in time from pupation to  
192 eclosion, a one-way ANOVA with Tukey’s multiple comparisons was used. To analyze any  
193 phenotypic effects on pupation/eclosion time across replicates ( $n=6$ /concentration) by delaying  
194 the introduction of mannitol to larvae by 72 hours, we used a 2-way ANOVA and Tukey’s  
195 multiple comparisons Tests in Graphpad. Differences in the number of larvae that pupated, but  
196 did not eclose, across concentrations in the delayed-introduction treatments were analyzed using  
197 Fisher’s exact tests in Graphpad.

198 Oviposition choice was tested using a chi square against a 50-50 population, and against our  
199 control-control vial populations.

## 200 **Results**

### 201 **Effects of larval ingestion of mannitol on adult body size**

202 Adult female body size decreased as mannitol concentration increased, with 0.8 M emerging  
203 adults having smaller body sizes than 0 M or 0.4 M emerging adults (Fig 1, Dunn's: 0 M-0.8 M,  
204  $Z=4.44$ ,  $p<0.0001$ ; 0.4 M-0.8 M,  $Z=2.59$ ,  $p=0.029$ ; 0 M-0.4 M,  $Z=2.12$ ,  $p=0.10$ ). Male body size  
205 also decreased as mannitol concentration increased, with 0.8 M and 0.4 M emerging adults  
206 having smaller body sizes than 0 M emerging adults (Fig 1, Dunn's: 0 M-0.8 M,  $Z=4.77$ ,  
207  $p<0.0001$ ; 0 M-0.4 M,  $Z=4.12$ ,  $p=0.0001$ ; 0.4 M-0.8 M,  $Z=0.88$ ,  $p>0.99$ ). For females, the linear  
208 regression of mannitol concentration on body size was  $y=-0.04930x+1.022$  ( $F=21.7$ ,  $p<0.0001$ ,  
209  $R^2=0.12$ ); for males,  $y=-0.04644x+0.8992$  ( $F=26.90$ ,  $p<0.0001$ ,  $R^2=0.14$ ). The slopes did not  
210 differ between males and females ( $F=0.04$ ,  $p=0.84$ ) indicating increasing mannitol concentration  
211 did not affect one sex's body size differently than the other (2-way ANOVA: interaction effect,  
212  $F=1.07$ ,  $df=2$ ,  $p=0.34$ ). The intercepts were significantly different ( $F=792.6$ ,  $p<0.0001$ )  
213 indicating females had larger body sizes than males at all concentrations (2-way ANOVA: sex,  
214  $F=769.2$ ,  $df=1$ ,  $p<0.0001$ ).

215

216 **Fig 1. Concentration-dependent decreases in body sizes of adult *D. melanogaster* fed**  
217 **mannitol as larvae.** Boxplots showing thorax lengths of males and females across increasing  
218 concentrations of mannitol; ingesting increasing mannitol concentration as larvae significantly  
219 decreases thorax lengths in emerging adults. Letters indicate significant differences between

220 treatments (Dunn's:  $p < 0.05$ ). Linear regressions show larval ingestion of increasing mannitol  
221 concentrations decreases emerging adult thorax lengths in males and females [females:  $y = -$   
222  $0.04930x + 1.022$  ( $F = 21.7$ ,  $p < 0.0001$ ,  $R^2 = 0.12$ ); for males,  $y = -0.04644x + 0.8992$  ( $F = 26.90$ ,  
223  $p < 0.0001$ ,  $R^2 = 0.14$ )].

## 224 **Concentration-dependent developmental delay prior to the onset of** 225 **pupation and reductions in survival**

### 226 **Developmental delay**

227 Time to pupation was significantly increased in the 0.4 M, 0.6 M, and 0.8 M conditions as  
228 compared to controls (Fig 2, ANOVA with Tukey's: 0.4 M,  $q = 8.61$ ,  $p < 0.0001$ ; 0.6 M,  $q = 14.35$ ,  
229  $p < 0.0001$ ; 0.8 M,  $q = 8.97$ ,  $p < 0.0001$ ), but not the 0.2 M condition ( $q = 3.15$ ,  $p = 0.18$ ). Time to  
230 adult eclosion was significantly increased in all the treatment conditions as compared to controls  
231 (ANOVA with Tukey's: 0.2 M,  $q = 4.11$ ,  $p = 0.04$ ; 0.4 M,  $q = 8.96$ ,  $p < 0.0001$ ; 0.6 M,  $q = 14.85$ ,  
232  $p < 0.0001$ ; 0.8 M,  $q = 11.52$ ,  $p < 0.0001$ ). However, the time between pupation and eclosion was  
233 not significantly different from controls in any mannitol treatment (S2 Fig, ANOVA:  $F = 1.04$ ,  
234  $p = 0.39$ ), indicating the major cause of eclosion delay was a delay in the onset of pupation.

235

236 **Fig 2. Concentration-dependent developmental delay in *D. melanogaster* larvae fed**  
237 **increasing concentrations of mannitol. (left)** Time to pupation in *D. melanogaster* larvae was  
238 significantly increased in 0.4 M-0.8 M conditions as compared to 0.2 M and control conditions.  
239 Letters indicate highly significant differences between concentrations (ANOVA with Tukey's,  
240  $p < 0.05$ ). **(right)** Time to eclosion in *D. melanogaster* pupae was significantly increased in 0.2

241 M-0.8 M conditions. Letters indicate significant differences between concentrations (ANOVA  
242 with Tukey's,  $p < 0.05$ ). Error bars represent one standard deviation.

### 243 **Reduced survival**

244 We next assessed the effect of mannitol on *D. melanogaster* larval and pupal mortality. Mortality  
245 was concentration dependent for *D. melanogaster* larvae and pupae when assessed prior to  
246 eclosion, with 0.4 M, 0.6 M, and 0.8 M treatments showing a significant difference from the  
247 control (S3 Fig, Mantel-Cox: 0.2 M,  $X^2=0.28$ ,  $p=0.60$ ; 0.4 M,  $X^2=9.40$ ,  $p=0.002$ ; 0.6 M,  
248  $X^2=23.53$ ,  $p < 0.001$ ; 0.8 M,  $X^2=19.41$ ,  $p < 0.001$ ).

249 Highly significant differences in larval mortality occurred as early as 48 hours after egg laying in  
250 the 0.6 M and 0.8 M (Fig 3, Mantel-Cox: 0.6 M,  $X^2=5.24$ ,  $p=0.022$ ; 0.8 M,  $X^2=10.39$ ,  $p=0.001$ )  
251 and 72 hours after egg laying in the 0.4 M, 0.6 M, and 0.8 M (Mantel-Cox: 0.4 M,  $X^2=4.47$ ,  
252  $p=0.035$ ; 0.6 M,  $X^2=11.81$ ,  $p=0.001$ ; 0.8 M,  $X^2=11.88$ ,  $p=0.001$ ).

253

254 **Fig 3. Proportion of larvae dead after mannitol ingestion at different time points during**  
255 **development.** Proportion of *D. melanogaster* larvae dead at 72 hours after egg lay, prior to  
256 pupation (inclusive of deaths at 72 hours), and prior to eclosion (inclusive of 72 hour and prior to  
257 pupation deaths), across increasing concentrations of mannitol. The three-parameter best-fit  
258 sigmoidal functions are shown, and the function for pre-eclosion mortality was used to calculate  
259 the  $LC_{50}$  for *D. melanogaster* prior to eclosion (0.36 M mannitol).

260 The best-fit sigmoidal curve for pre-eclosion  $LC_{50}$  data was:

261 
$$\text{Pr}(\text{Pre-eclosion mortality}) = 0.7765 / (1 + e^{-([\text{mannitol}] - 0.3019) / 0.0984})$$

262 This curve was a significant fit to the data (Fig 3;  $R^2=0.96$ ,  $p=0.039$ ) and using the equation we  
263 found the pre-eclosion  $LC_{50}$  to be 0.36 M mannitol.

264 In 0.4 M and 0.6 M treatments, there were significant increases in the proportion of larvae that  
265 died prior to eclosion but after pupation, compared to both 0 M (Fig 6, Fisher's: 0.4 M,  
266  $p=0.0015$ ; 0.6 M,  $p=0.0046$ ) and 0.2 M (0.4 M,  $p=0.0023$ ; 0.6 M,  $p=0.0062$ ); 0 M and 0.2 M  
267 were not different from one another ( $p>0.99$ ). 0.8 M treatments were not significantly different,  
268 but this may be an effect of small sample size due to decreased survival during the larval stage in  
269 this treatment ( $n=9$  pupae, Fisher's: 0 M,  $p=0.08$ ; 0.2 M,  $p=0.09$ ).

## 270 **Concentration-dependent reduction of mannitol's developmental** 271 **effects by delaying mannitol introduction to larvae for 72 hours**

### 272 **Partial rescue of developmental delays**

273 Introducing larvae to mannitol after 72 hours [72-hour plates] significantly decreased pupation  
274 and eclosion times in the 0.4 M treatment (Fig 4a; ANOVA with Tukey's, pupation,  $q=12.71$ ,  
275  $p<0.0001$ ; eclosion time,  $q=7.94$ ,  $p<0.0001$ ), and the 0.8 M treatment (pupation time:  $q=7.02$ ,  
276  $p<0.0001$ ; eclosion time:  $q=5.23$ ,  $p=0.0047$ ) as compared to plates where larvae were fed the  
277 same concentration of mannitol from hour 0 after egg lay.

278 Pupation and eclosion times were no longer significantly different from 0 M conditions in the 0.4  
279 M 72-hour plates (Fig 4b; ANOVA with Tukey's, pupation,  $q=2.00$ ,  $p=0.72$ ; eclosion,  $q=2.82$ ,  
280  $p=0.35$ ). Pupation and eclosion times were still significantly longer than controls in 0.8 M 72-  
281 hour plates (pupation:  $q=9.30$ ,  $p<0.0001$ ; eclosion:  $q=9.20$ ,  $p<0.0001$ ).

282

283 **Fig 4. Differences in developmental delay when mannitol introduction is introduced after**  
284 **72 hours. (a)** Pupation and eclosion times in *D. melanogaster* larvae were significantly  
285 decreased in 0.4 M and 0.8 M conditions when larvae were first placed on mannitol 72 hours  
286 after egg lay. Stars indicate significant differences between 0 hour and 72-hour plates (Tukey's,  
287 ns=not significant, \*\*= $p<0.01$ , \*\*\*= $p<0.001$ ). Error bars represent one standard deviation. **(b)**  
288 Pupation and eclosion times were not significantly different between 0 M and 0.4 M treatments  
289 when larvae were first placed on mannitol 72 hours after egg lay; larvae fed 0.8 M mannitol after  
290 72 hours still had prolonged pupation and eclosion times. Stars indicate significant differences  
291 between 0 hour and 72-hour plates (Tukey's, ns= not significant, \*\*\*\*= $p<0.0001$ ). Error bars  
292 represent one standard deviation.

### 293 **Partial rescue of larval survival**

294 Waiting 72 hours before introducing larvae to mannitol media also significantly increased  
295 survival to eclosion across replicates at 0.4 M and 0.8 M (Fig 5a, Mantel-Cox: 0.4 M,  $X^2=8.91$ ,  
296  $p=0.003$ ; 0.8M,  $X^2=6.80$ ,  $p=0.009$ ). In the 0.4 M 72-hour plates, survival was no longer  
297 significantly different from 0 M treatment (Fig 5b;  $X^2=0.00$ ,  $p=0.986$ ). The 0.8 M 72-hour plates  
298 treatments were still significantly different from 0 M ( $X^2=8.03$ ,  $p=0.005$ ).

299

### 300 **Fig 5. Concentration-dependent partial rescue of survival when mannitol is introduced**

301 **after 72 hours. (a)** When mannitol introduction to *D. melanogaster* larvae is delayed by 72  
302 hours, 0.4 M and 0 M treatments no longer differ in their survival while 0.8 M treatments still  
303 have significantly decreased survival compared to controls. Stars indicate significant differences  
304 between 0 hour and 72-hour plates (Mantel-Cox, ns=not significant, \*\*= $p<0.01$ ). Error bars  
305 represent one standard deviation. **(b)** Pre-eclosion survival was significantly increased in 0.4 M

306 and 0.8 M conditions when larvae were first placed on mannitol media after 72 hours instead of  
307 at hour 0 (egg lay). Stars indicate significant differences between control and 72-hour treatments  
308 (Mantel-Cox, ns=not significant, \*\*= $p<0.01$ ). Error bars represent one standard deviation.  
309 The percent of pupae that did not eclose significantly decreased in 0.4 M treatments when  
310 mannitol introduction was delayed by 72 hours, but no significant difference was found between  
311 0 hour and 72 hour mannitol introduction in 0.8 M treatments (Fig 6, Fisher's: 0.4 M,  $p=0.017$ ;  
312 0.8 M,  $p>0.99$ ). The percent of pupae that did not eclose in 0.4 M 72-hour plates was not  
313 significantly different from 0 M controls (Fisher's:  $p>0.99$ ).

314

315 **Fig 6. Concentration-dependent eclosion failure, and change in eclosion failure due to**  
316 **delayed mannitol introduction, across increasing concentrations of mannitol.** Percent of  
317 larvae that pupated but failed to eclose across increasing concentrations of mannitol (0 M-0.8 M)  
318 and in 0.4 M and 0.8 M 72-hour plate treatments. Letters indicate highly statistically significant  
319 differences between treatments (Fisher's:  $p<0.01$ ). Stars indicated significant differences  
320 between 72 hour and 0 hour plates of the same concentration (Fisher's: ns=not significant,  
321 \*= $p<0.05$ ).

## 322 **Mannitol avoidance in female oviposition choice assays**

323 The number of eggs laid in the 0.5 M mannitol vials of the mannitol-control choice arenas was  
324 significantly lower than expected when compared to a 50-50 population of the same number, or  
325 to either side of the control-control arenas (Fig 7, Chi square: 0.5 M vs 50-50,  $X^2=514.0$ ,  
326  $p<0.0001$ ; 0.5 M vs 0 M left side,  $X^2=600.8$ ,  $p<0.0001$  or vs 0 M right side,  $X^2=392.3$ ,  
327  $p<0.0001$ ). 24.7 % of the total eggs were laid in the mannitol side.

328

329 **Figure 7. Adult females avoid laying eggs on mannitol foods in choice arenas.** Females laid  
330 more eggs on control media than 0.5 M mannitol media in mannitol-control choice arenas  
331 (n=7,120 eggs; Chi square, \*\*\*= p<0.0001).

## 332 **Discussion**

333 Several recent studies support the idea that the positive relationship between body size  
334 and developmental duration can be reversed due to variable diets, even across different insect  
335 taxa [17,40–42]. The phenotypic effects of a mannitol diet on this relationship in *D.*  
336 *melanogaster* are similar to the effects of high-sugar diets, produced via disrupting the insulin-  
337 signaling pathway [10,12,17,18]. Mannitol increased *D. melanogaster* developmental duration  
338 and decreased emerging adult body size in a concentration-dependent manner. Increased  
339 developmental duration was a result of delayed onset of pupation, not prolonged pupal  
340 metamorphosis. Stage of larval development when mannitol was introduced (first or third larval  
341 instar) and mannitol concentration influenced the severity of mannitol's phenotypic effects; 0.4  
342 M mannitol introduced at 72 hours no longer affected development time or survival, but 0.8 M  
343 mannitol still had significant, if lessened, effects. These phenotypic effects are consistent with  
344 those of high-sugar diets that generate smaller adult body sizes and prolonged development prior  
345 to the onset of pupation [10,17,18]; as with mannitol, the high-concentration sugar diets have  
346 stronger effects earlier in larval development (prior to the third instar) [10]. Females avoided  
347 mannitol foods as oviposition substrates despite the heightened carbohydrate concentration,  
348 indicating that mannitol (a product of microbial fermentation) may provide important  
349 information about oviposition site quality to females [16].



350 Models of the independent effects of growth rate, critical weight, and the interval to the  
351 cessation of growth on the relationship between body size and developmental duration in  
352 *Manduca sexta* indicate that variation in growth rate can lead to a negative relationship  
353 (decreasing body size while increasing developmental duration), while variations in interval to  
354 the cessation of growth and critical weight generally lead to positive relationships [4,43]. Critical  
355 weight typically occurs directly after the second molt in *D. melanogaster*, at approximately 72  
356 hours post-hatching [2,31]. Mannitol, when given at high concentrations only after 72 hours of  
357 development, still increased *D. melanogaster* developmental times, making it unlikely that  
358 mannitol decouples the positive relationship between body size and developmental duration via  
359 altering critical weight. Instead, mannitol is likely impacting growth rate and/or the interval to  
360 cessation of growth, potentially by disrupting the insulin/TOR signaling pathway which is  
361 responsible for regulating these variables in *D. melanogaster* [44].

362 In *D. melanogaster*, a carbohydrate-rich diet led to delays in eclosion and smaller pupal  
363 case sizes [17]. Extremely high sugar (e.g., 1 M sucrose) diets produced insulin resistance,  
364 leading to smaller wandering third instar larvae and smaller eclosed adults irrespective of protein  
365 availability, the sugar used, or osmolarity of the food medium during development [10]. In  
366 addition, high-sugar feeding led to dramatic delays in pupation [10,12], similar to what we saw  
367 in our 0.4 M - 0.8 M mannitol treatments. Delays in eclosion due to high-sugar diets affecting the  
368 insulin-signaling pathway cause delayed onset of pupation, not prolonged metamorphosis [18];  
369 again, this is the same phenotype we saw when larvae were fed mannitol diets.

370 Feeding third instar larvae high-sugar diets for just 12 hours produced similar  
371 transcriptional effects in genes associated with glucose transport and metabolism, lipid synthesis  
372 and storage, trehalose synthesis and stability, and oxidative stress compared to larvae being fed

373 high-sugar diets since egg lay, just with lower fold-changes in expression [10]. We observed that  
374 third instar larvae fed 0.4 M mannitol had normal developmental durations, while third instar  
375 larvae fed 0.8 M mannitol had only partially alleviated mannitol's developmental effects. Lower,  
376 but still significant, levels of gene expression changes in third instar larvae due to the  
377 introduction of high-sugar diets may explain how mannitol's developmental effects were not  
378 completely restored to normal at the highest concentrations (0.8 M), even when mannitol  
379 introduction was delayed to the third instar.

380         Because concentrations of all non-mannitol carbohydrates were kept the same in larval  
381 foods, *D. melanogaster* would need to be able to metabolize mannitol in order for it to increase  
382 levels of trehalose in the hemolymph like the other, metabolizable sugars (glucose and sucrose)  
383 used in previous studies. No studies have examined if *D. melanogaster*, or its common gut  
384 microbes, can metabolize mannitol, but recent work on another insect, *Tribolium castaneum*,  
385 shows that adult females have higher trehalose levels in the hemolymph after feeding on  
386 mannitol [26]. Circulating trehalose is responsible for TOR activation in *D. melanogaster* fat  
387 bodies, contributing to cell growth during development; mannitol's catalysis to trehalose may be  
388 responsible for mediating its effects on growth rate and the interval to the cessation of growth via  
389 the insulin/TOR signaling pathway similar to other carbohydrates [11,45].

390         The insulin/TOR signaling pathway regulates development in response to nutrients, and  
391 disruptions of this pathway are known to affect body size and developmental duration  
392 [19,44,46,47]. Genetic defects in the insulin signaling pathway (including dILPs, *Drosophila*  
393 insulin-like proteins), reduced insulin receptor activity, the inhibition of DREF (DNA  
394 replication-related element-binding factor), or disruptions in TOR activation, can cause long  
395 development times and smaller-bodied flies, similar to the adverse mannitol developmental

396 effects we observed in larvae [9,19,48–53]. High-sugar diet fed larvae experience reduced  
397 growth due to insulin signaling resistance, even when dILP levels are increased, while reductions  
398 in nutrition can simply prevent the release of dILPs, thereby reducing growth [10,44]. dILP  
399 expression in response to a mannitol diet should be explored to better understand if disruptions to  
400 the insulin/TOR signaling pathway mediate mannitol effects on larval body size, growth, and  
401 developmental duration, especially given the similarity between the adverse effects of mannitol  
402 and the adverse effects of high-carbohydrate diets on *D. melanogaster* larvae.

403         Proper growth during development can also influence survival to, and in, adulthood [28].  
404 High sugar diets cause mortality in larvae of numerous fly species, including *D. melanogaster*  
405 and *Drosophila mojavensis* [12,18]; We found that mannitol causes mortality in *D. melanogaster*  
406 larvae after 48 hours in a concentration-dependent manner, with an LC<sub>50</sub> of 0.36 M. In addition,  
407 of the larvae that pupated in the 0.4 M and 0.6 M treatments, a significant number of them failed  
408 to eclose. Adverse mannitol effects were ameliorated in third instar larvae fed 0.4 M mannitol  
409 only after 72 hours of development, but not in larvae fed 0.8 M mannitol after 72 hours,  
410 indicating that mannitol's effects depend on both the developmental stage and concentration at  
411 which it is introduced.

412         Alternatively, starvation and/or osmotic stress could be potential mechanisms for  
413 mannitol's effects on larval survival. However, mannitol's effects are unlikely to be related  
414 strictly to starvation given mismatches between starvation phenotypes and our results. Post-  
415 critical weight starvation causes accelerated emergence (our 72 hour plates saw normal or  
416 delayed emergence) while pre-critical weight starvation causes developmental delay but normal  
417 adult body sizes (unlike our smaller adults) [54]. Simply reducing nutritional availability  
418 throughout development generates smaller adult body sizes, but no change in survival through

419 eclosion [55]. For these reasons, as well as the fact that all mannitol-fed larvae received the same  
420 basic nutrients as controls, we consider reduced nutritional availability to be an unlikely driver of  
421 mannitol's lethality.

422 Mannitol may also be acting as an osmotic stressor to larvae, as mannitol is known for its  
423 diuretic effects [56–58]. Other species (including the Dipteran, *Aedes aegypti*) exhibit longer  
424 development times, decreased body size, and/or reduced survival in osmotically stressful  
425 environments [59–62]. *D. melanogaster* larvae have a severe aversive reaction to high  
426 concentrations of osmotically stressful substances like salt [63]. This aversive reaction is coupled  
427 with larvae decreasing their food intake [63], and decreases of 30 % in larval mass at the third  
428 instar [64]. Extremely high sugar diets (20% sucrose) have been shown to decrease feeding in *D.*  
429 *melanogaster* larvae [12] and decreased feeding at the highest mannitol concentrations may  
430 explain the atypical trends of survival and developmental duration in our 0.8 M conditions  
431 (where 0.6 M mannitol often had slightly more adverse effects than 0.8 M mannitol). However, it  
432 should be noted that *D. melanogaster* larvae have excellent osmoregulatory ability and other  
433 *Drosophila* species' larvae have been found living in abundance in osmotically stressful, high  
434 sugar environments [65,66].

435 Our oviposition choice data shows that females avoid laying on mannitol media, even  
436 when the media has more abundant carbohydrates, suggesting they may be able to perceive the  
437 presence of mannitol at concentrations of 0.5 M and above. As a product of microbial  
438 fermentation in many microorganisms [21,23], mannitol may indicate important information  
439 about the quality of oviposition locations to females, especially given that females pick  
440 nutritional compositions of pre-rotting fruit over a composition more similar to currently-rotting  
441 fruit to lay their eggs (despite these environments being suboptimal for larval performance at the

442 time of egg lay; [16,67]). Adult body size affects individual fecundity [68,69], so female *D.*  
443 *melanogaster* should attempt to avoid oviposition sites that reduce the body size and survival of  
444 offspring.

445 This study is the first to examine the effects of mannitol on development in any species of  
446 holometabolous insect. In the sweet potato whitefly (*Bemisia tabaci*), mannitol was found not to  
447 be lethal to nymphs, only adults, at a concentration of 10% [70]. Given mannitol's vastly  
448 different effects on adults of different species (from nutritive to lethal), more work should be  
449 done to understand mannitol's effects on development across taxa [20,26,27,70–74]. This may  
450 further our understanding of how species differ mechanistically in their responses to this polyol,  
451 particularly important since adverse mannitol developmental effects closely align with the  
452 phenotypic effects of high-sugar diets on *D. melanogaster* larvae, mediated via the insulin-  
453 signaling pathway.

454 A single, genetically variable insulin signaling pathway regulates growth, reproduction,  
455 longevity, and metabolism in all insects, and contains conserved elements across all animals  
456 [75,76]. This pathway is involved in numerous examples of environmentally-driven  
457 polyphenisms generated during insect development, including caste differentiation in social  
458 insects, as well as geographically- and nutritionally-driven morphological variation [77–81].  
459 Genetic and epigenetic differences in this pathway allow species and populations to take unique  
460 advantage of environmental variables (e.g. diet, temperature, seasonality), generating phenotypic  
461 plasticity in developmental variables and allometric relationships that maximize fitness [79–81].  
462 Mannitol's developmental effects, if acting through this pathway, provide an opportunity to  
463 compare phenotypic variation in response to the nutritional environment, generated by the  
464 evolution of insulin signaling genes across species. This study joins a growing body of work

465 indicating that the frequently-cited positive relationship between duration of development and  
466 body size within a population can be complicated by environmental variation, particularly via  
467 dietary influences on insulin signaling. Our work also suggests that the importance of this  
468 variation, and its influence on specific developmental parameters, may change as development  
469 progresses past various internal regulatory cues. Mannitol's effects on development provide a  
470 novel paradigm for exploring the environmentally-cued regulation of developmental-  
471 physiological relationships in insects.

## 472 **Conclusion**

473 Mannitol causes concentration-dependent developmental delays, smaller adult body sizes, and  
474 decreased survival in *D. melanogaster* larvae and pupae. These adverse developmental effects  
475 can be alleviated at a concentration of 0.4 M if mannitol introduction is delayed until larvae are  
476 72 hours old (approximately L3), but not at a concentration of 0.8 M. Adult females perceive and  
477 avoid mannitol (at a concentration of 0.5 M) when given a choice in oviposition site, likely due  
478 to mannitol's adverse effects on offspring survival and in spite of the mannitol food having more  
479 abundant carbohydrates. Mannitol at high concentrations may be acting via the insulin  
480 signaling/TOR pathway to decouple the typical, direct relationship observed between body size  
481 and developmental duration, creating similar effects to other high-carbohydrate diets.

## 482 **Acknowledgements**

483 We thank Meghan Campbell, Natalie Carroll, Virginia Caponera, and Lauren Hultgren for  
484 assistance caring for and counting larvae. Kaitlin Baudier provided assistance with basic  
485 methodological and statistical procedures. Jennifer Viveiros provided support and training in fly  
486 husbandry, sexing, and making foods. This work was supported by funds from Drexel

487 University's Office of Research (to DRM). Work in the Marena lab is supported by the  
488 National Science Foundation, IOS-1856439 (to DRM).

## 489 References

- 490 1. Davidowitz G, Nijhout HF. The Physiological Basis of Reaction Norms: The Interaction Among  
491 Growth Rate, the Duration of Growth and Body Size. *Integr Comp Biol.* 2004;44: 443–449.
- 492 2. De Moed GH, Kruitwagen CLJJ, Jong G De, Scharloo W. Critical weight for the induction of  
493 pupariation in *Drosophila melanogaster*: genetic and environmental variation. *J Evol Biol.*  
494 1999;12: 852–858.
- 495 3. Roff DA. Trade-offs between growth and reproduction: an analysis of the quantitative genetic  
496 evidence. *Journal Evol Biol.* 2000;13: 434–445.
- 497 4. Nijhout HF, Roff DA, Davidowitz G. Conflicting processes in the evolution of body size and  
498 development time. *Philos Trans R Soc B Biol Sci.* 2010;365: 567–575.  
499 doi:10.1098/rstb.2009.0249
- 500 5. Blanckenhorn WU. Adaptive Phenotypic Plasticity in Growth, Development, and Body Size in the  
501 Yellow Dung Fly. *Evolution.* 1998;52: 1394–1407.
- 502 6. Zwaan BJ, Bijlsma R, Hoekstra RF. On the developmental theory of ageing. II. the effect of  
503 developmental temperature on longevity in relation to adult body size in *D. melanogaster*.  
504 *Heredity.* 1992;68: 123–130. doi:10.1038/hdy.1992.19
- 505 7. Blueweiss AL, Fox H, Kudzma V, Nakashima D, Peters R, Sams S, et al. Relationships between  
506 Body Size and Some Life History Parameters. *Oecologia.* 2013;37: 257–272.
- 507 8. Thomas RH. Ecology of body size in *Drosophila buzzatii*: untangling the effects of temperature  
508 and nutrition. *Ecol Entomol.* 1993;18: 84–90.
- 509 9. Alfa RW, Kim SK. Using *Drosophila* to discover mechanisms underlying type 2 diabetes. *Dis*  
510 *Model Mech.* 2016;9: 365–376. doi:10.1242/dmm.023887
- 511 10. Musselman LP, Fink JL, Narzinski K, Ramachandran PV, Hathiramani SS, Cagan RL, et al. A  
512 high-sugar diet produces obesity and insulin resistance in wild-type *Drosophila*. *Dis Model Mech.*  
513 2011;4: 842–849. doi:10.1242/dmm.007948
- 514 11. Morris SNS, Coogan C, Chamseddin K, Fernandez-Kim SO, Kolli S, Keller JN, et al.  
515 Development of diet-induced insulin resistance in adult *Drosophila melanogaster*. *Biochim*  
516 *Biophys Acta.* 2012;1822: 1230–1237. doi:10.1016/j.bbadis.2012.04.012
- 517 12. Rovenko BM, Kubrak OI, Gospodaryov D V, Perkhulyan N V, Yurkevych IS, Sanz A, et al. High  
518 sucrose consumption promotes obesity whereas its low consumption induces oxidative stress in  
519 *Drosophila melanogaster*. *J Insect Physiol.* 2015;79: 42–54. doi:10.1016/j.jinsphys.2015.05.007
- 520 13. Skorupa DA, Dervisevendic A, Zwiener J, Pletcher SD. Dietary composition specifies  
521 consumption, obesity, and lifespan in *Drosophila melanogaster*. *Aging Cell.* 2008;7: 478–490.  
522 doi:10.1111/j.1474-9726.2008.00400.x
- 523 14. Kannan K, Fridell Y-WC. Functional implications of *Drosophila* insulin-like peptides in

- 524 metabolism, aging, and dietary restriction. *Front Physiol.* 2013;4: Article 288.  
525 doi:10.3389/fphys.2013.00288
- 526 15. Baker KD, Thummel CS. Diabetic Larvae and Obese Flies-Emerging Studies of Metabolism in  
527 *Drosophila*. *Cell Metab.* 2007;6: 257–266. doi:10.1016/j.cmet.2007.09.002
- 528 16. Lihoreau M, Poissonnier L-A, Isabel G, Dussutour A. *Drosophila* females trade off good nutrition  
529 with high-quality oviposition sites when choosing foods. *J Exp Biol.* 2016;219: 2514–2524.  
530 doi:10.1242/jeb.142257
- 531 17. Reis T. Effects of synthetic diets enriched in specific nutrients on *Drosophila* development, body  
532 fat, and lifespan. *PLoS One.* 2016;11: e0146758. doi:10.1371/journal.pone.0146758
- 533 18. Matzkin LM, Johnson S, Paight C, Bozinovic G, Markow TA. Dietary Protein and Sugar  
534 Differentially Affect Development and Metabolic Pools in Ecologically Diverse *Drosophila*. *J*  
535 *Nutr.* 2011;141: 1127–1133. doi:10.3945/jn.111.138438.fruit
- 536 19. Chen C, Jack J, Garofalo RS. The *Drosophila* Insulin Receptor Is Required for Normal Growth.  
537 *Endocrinology.* 1996;137: 846–856.
- 538 20. Fiocca K, Barrett M, Waddell EA, McNair C, O'Donnell S, Marena DR. Mannitol ingestion  
539 causes concentration-dependent, sex-specific mortality in adults of the fruit fly (*Drosophila*  
540 *melanogaster*). *PLoS One.* 2019;14: e0213760.
- 541 21. Jamieson PR, Le AS, Mulderrig KB. Sorbitol and mannitol. In: Nabors LO, Gelardi RC, editors.  
542 *Alternative Sweeteners*. New York, NY: Marcel Dekker, Inc.; 2001. pp. 333–348.
- 543 22. Lewis DH, Smith DC. Sugar Alcohols (Polyols) in Fungi and Green Plants. I. Distribution,  
544 Physiology and Metabolism. *New Phytol.* 1967;66: 143–184.
- 545 23. Onishi H, Suzuki T. Production of D-mannitol and glycerol by yeasts. *Appl Microbiol.* 1968;16:  
546 1847–1952.
- 547 24. Saha BC, Racine FM. Biotechnological production of mannitol and its applications. *Applied*  
548 *Microbiology and Biotechnology.* 2011. pp. 879–891. doi:10.1007/s00253-010-2979-3
- 549 25. Yao CK, Tan HL, van Langenberg DR, Barrett JS, Rose R, Liels K, et al. Dietary sorbitol and  
550 mannitol: Food content and distinct absorption patterns between healthy individuals and patients  
551 with irritable bowel syndrome. *J Hum Nutr Diet.* 2014;27: 263–275. doi:10.1111/jhn.12144
- 552 26. Kikuta S. Response of *Tribolium castaneum* to dietary mannitol, with remarks on its possible  
553 nutritive effects. *PLoS One.* 2018;13: e0207497. doi:10.1371/journal.pone.0207497
- 554 27. Takada T, Sato R, Kikuta S. A mannitol/sorbitol receptor stimulates dietary intake in *Tribolium*  
555 *castaneum*. *PLoS One.* 2017;12: e0186420. doi:10.1371/journal.pone.0186420
- 556 28. Mirth CK, Riddiford LM. Size assessment and growth control: How adult size is determined in  
557 insects. *BioEssays.* 2007;29: 344–355. doi:10.1002/bies.20552
- 558 29. O'Donnell S, Baudier K, Fiocca K, Marena DR. Erythritol ingestion impairs adult reproduction  
559 and causes larval mortality in *Drosophila melanogaster* fruit flies (Diptera: Drosophilidae). *J Appl*  
560 *Entomol.* 2017;00: 1–6. doi:10.1111/jen.12409
- 561 30. Makinen KK, Soderling E. A quantitative study of mannitol, sorbitol, xylitol, and xylose in wild  
562 berries and commercial fruits. *J Food Sci.* 1980;45: 367–371.
- 563 31. Tyler MS. Development of the Fruit Fly: *Drosophila melanogaster*. *Developmental Biology: A*



- 564 Guide for Experimental Study. 2nd ed. Sunderland, MA: Sinauer Associates Inc. Publishers; 2000.  
565 pp. 85–106.
- 566 32. Chakraborty R, Vepuri V, Mhatre SD, Paddock BE, Miller S, Michelson SJ, et al. Characterization  
567 of a *Drosophila* Alzheimer's Disease Model: Pharmacological Rescue of Cognitive Defects. PLoS  
568 One. 2011;6: e20799. doi:10.1371/journal.pone.0020799
- 569 33. Chechi TS, Ali Syed Z, Prasad NG. Virility does not imply immensity: Testis size, accessory  
570 gland size and ejaculate depletion pattern do not evolve in response to experimental manipulation  
571 of sex ratio in *Drosophila melanogaster*. J Insect Physiol. 2017;98: 67–73.  
572 doi:10.1016/j.jinsphys.2016.11.012
- 573 34. Bergland AO, Genissel A, Nuzhdin S V., Tatar M. Quantitative trait loci affecting phenotypic  
574 plasticity and the allometric relationship of ovariole number and thorax length in *Drosophila*  
575 *melanogaster*. Genetics. 2008;180: 567–582. doi:10.1534/genetics.108.088906
- 576 35. Schneider CA, Rasband WS, Eliceiri KW. NIH Image to ImageJ: 25 years of image analysis. Nat  
577 Methods. 2012;9: 671–675.
- 578 36. IBM SPSS Statistics for Windows. Armonk, NY: IBM Corp.; 2016.
- 579 37. Sigmaplot for Windows. San Jose, CA.: Systat Software, Inc.; 2013.
- 580 38. Graphpad Prism for Windows. La Jolla, CA: Graphpad Software, Inc; 2018.
- 581 39. Bewick V, Cheek L, Ball J. Statistics review 12: Survival analysis. Crit Care. 2004;8: 389–394.  
582 doi:10.1186/cc2955
- 583 40. Huang X-L, Lan X, He H-M, Xue F-S. Effect of rearing conditions on the correlation between  
584 larval development time and pupal weight of the rice stem borer, *Chilo suppressalis*. Ecol Evol.  
585 2018;8: 12694–12701. doi:10.1002/ece3.4697
- 586 41. Xiao HJ, Xue FS, Liu YQ, Zhu XF. Comparison of photoperiodic response between rice- and  
587 water-oat populations of *Chilo suppressalis* (Walker). Acta Entomologica Sin. 2005;48: 749–753.
- 588 42. Danielsen ET, Moller ME, Rewitz KF. Nutrient Signaling and Developmental Timing of  
589 Maturation. Curr Top Dev Biol. 2013;105: 37–67.
- 590 43. Davidowitz G, Roff DA, Nijhout HF. A Physiological Perspective on the Response of Body Size  
591 and Development Time to Simultaneous Directional Selection. Integr Comp Biol. 2005;531: 525–  
592 531. doi:10.1093/icb/45.3.525
- 593 44. Mirth CK, Shingleton AW. Integrating body and organ size in *Drosophila*: Recent advances and  
594 outstanding problems. Front Endocrinol. 2012;3: Article 49. doi:10.3389/fendo.2012.00049
- 595 45. Kim J, Neufeld TP. Dietary sugar promotes systemic TOR activation in *Drosophila* through AKH-  
596 dependent selective secretion of Dilp3. Nat Commun. 2015;6: 6846. doi:10.1038/ncomms7846
- 597 46. Hyun S. Body size regulation by maturation steroid hormones: A *Drosophila* perspective. Front  
598 Zool. 2018;15: Article 44. doi:10.1186/s12983-018-0290-9
- 599 47. Hyun S. Body size regulation and insulin-like growth factor signaling. Cell Mol Life Sci. 2013;70:  
600 2351–2365. doi:10.1007/s00018-013-1313-5
- 601 48. Ikeya T, Galic M, Belawat P, Nairz K, Hafen E. Nutrient-dependent expression of insulin-like  
602 peptides from neuroendocrine cells in the CNS contributes to growth regulation in *Drosophila*.  
603 Curr Biol. 2002;12: 1293–1300. doi:10.1016/S0960-9822(02)01043-6

- 604 49. Shingleton AW, Das J, Vinicius L, Stern DL. The Temporal Requirements for Insulin Signaling  
605 During Development in *Drosophila*. PLoS Biol. 2005;3: e289. doi:10.1371/journal.pbio.0030289
- 606 50. Killip LE, Grewal SS. DREF is required for cell and organismal growth in *Drosophila* and  
607 functions downstream of the nutrition/TOR pathway. Dev Biol. 2012;371: 191–202.  
608 doi:10.1016/j.ydbio.2012.08.020
- 609 51. Brogiolo W, Stocker H, Ikeya T, Rintelen F, Fernandez R, Hafen E. An evolutionarily conserved  
610 function of the *Drosophila* insulin receptor and insulin-like peptides in growth control. Curr Biol.  
611 2001;11: 213–221. doi:10.1016/S0960-9822(01)00068-9
- 612 52. Layalle S, Arquier N, Léopold P. The TOR Pathway Couples Nutrition and Developmental  
613 Timing in *Drosophila*. Dev Cell. 2008;15: 568–577. doi:10.1016/j.devcel.2008.08.003
- 614 53. Grönke S, Clarke D-F, Broughton S, Andrews TD, Partridge L. Molecular evolution and  
615 functional characterization of *Drosophila* insulin-like peptides. PLoS Genet. 2010;6: e1000857.  
616 doi:10.1371/journal.pgen.1000857
- 617 54. Beadle GW, Tatum EL, Clancy CW. Food Level in Relation to Rate of Development and Eye  
618 Pigmentation in *Drosophila melanogaster*. Biol Bull. 1938;75: 447–462.
- 619 55. Ormerod KG, LePine OK, Abbineni PS, Bridgeman JM, Coorsen JR, Mercier AJ, et al.  
620 *Drosophila* development physiology, behavior, and lifespan are influenced by altered dietary  
621 composition. Fly. 2017;11: 153–170. doi:10.1080/19336934.2017.1304331
- 622 56. Grembecka M. Sugar alcohols — their role in the modern world of sweeteners: a review. Eur Food  
623 Res Technol. 2015;241: 1–14. doi:10.1007/s00217-015-2437-7
- 624 57. Elhassan E, Schrier RW. Disorders of Extracellular Volume. In: Johnson RJ, Feehally J, Floege J,  
625 editors. Comprehensive Clinical Nephrology. 5th Ed. Philadelphia, PA: Saunders; 2015. pp. 85–  
626 99.
- 627 58. Diaz-Fleischer F, Arredondo J, Lasa R, Bonilla C, Debernardi D, Perez-Staples D, et al. Sickly  
628 Sweet: Insecticidal Polyols Induce Lethal Regurgitation in Dipteran Pests. Insects. 2019;10:  
629 Article 53. doi:10.3390/insects10020053
- 630 59. Chinathamby K, Reina RD, Bailey PCE, Lees BK. Effects of salinity on the survival, growth and  
631 development of tadpoles of the brown tree frog, *Litoria ewingii*. Aust J Zool. 2006;54: 97–105.  
632 doi:10.1071/ZO06006
- 633 60. Wu C-S, Gomez-Mestre I, Kam Y-C. Irreversibility of a bad start: early exposure to osmotic stress  
634 limits growth and adaptive developmental plasticity. Oecologia. 2012;169: 15–22.  
635 doi:10.1007/s00442-01
- 636 61. Matthews BE. The influence of temperature and osmotic stress on the development and eclosion  
637 of hookworks eggs. J Helminthol. 1985;59: 217–224.
- 638 62. Clark TM, Flis BJ, Remold SK. Differences in the effects of salinity on larval growth and  
639 developmental programs of a freshwater and a euryhaline mosquito species (Insecta: Diptera,  
640 Culicidae). J Exp Biol. 2004;207: 2289–2295. doi:10.1242/jeb.01018
- 641 63. Niewalda T, Singhal N, Fiala A, Saumweber T, Wegener S, Gerber B. Salt Processing in Larval  
642 *Drosophila*: Choice, Feeding, and Learning Shift from Appetitive to Aversive in a Concentration-  
643 Dependent Way. Chem Senses. 2008;33: 685–692. doi:10.1093/chemse/bjn037
- 644 64. Naikhwah W, O'Donnell MJ. Salt stress alters fluid and ion transport by Malpighian tubules of

- 645 *Drosophila melanogaster*: evidence for phenotypic plasticity. J Exp Biol. 2011;214: 3443–3454.  
646 doi:10.1242/jeb.057828
- 647 65. Croghan PC, Lockwood APM. The Composition of the Haemolymph of the larva of *Drosophila*  
648 *melanogaster*. J Exp Biol. 1959;37: 339–343.
- 649 66. Nicolson SW. Eucalyptus nectar: production, availability, composition and osmotic consequences  
650 for the larva of the eucalypt nectar fly, *Drosophila flavohirta*. Suid-Afrikaanse Tydskrif vir Wet.  
651 1994;90: 75–79.
- 652 67. Soares NFS, Alves AN, Beldade P, Mirth CK. Adaptation to new nutritional environments: larval  
653 performance, foraging decisions, and adult oviposition choices in *Drosophila suzukii*. BMC Ecol.  
654 2017;17: Article 21. doi:10.1186/s12898-017-0131-2
- 655 68. Davidowitz G. Population and Environmental Effects on the Size-Fecundity Relationship in a  
656 Common Grasshopper across an Aridity Gradient. J Orthoptera Res. 2008;17: 265–271.
- 657 69. Honek A. Intraspecific Variation in Body Size and Fecundity in Insects: A General Relationship.  
658 Oikos. 1993;66: 483–492.
- 659 70. Hu JS, Gelman DB, Salvucci ME, Chen YP, Blackburn MB. Insecticidal activity of some reducing  
660 sugars against the sweet potato whitefly, *Bemisia tabaci*, Biotype B. J Insect Sci. 2010;10: Article  
661 203.
- 662 71. Nishiyama A, Nishioka S, Islam SM, Sakaguchi E. Mannitol Lowers Fat Digestibility and Body  
663 Fat Accumulation in Both Normal and Cecectomized Rats. J Nutr Sci Vitaminol. 2009;55: 242–  
664 251.
- 665 72. Min X, Li X, Hiura S, Kawasaki K, Xiao J, Sakaguchi E. Effect of D-mannitol on nitrogen  
666 retention, fiber digestibility and digesta transit time in adult rabbits. Anim Sci J. 2013;84: 551–  
667 555. doi:10.1111/asj.12041
- 668 73. Ozalp P, Emre I. The effects of carbohydrates upon the survival and reproduction of adult female  
669 *Pimpla turionellae* L. (Hym., Ichneumonidae). J Appl Entomol. 2001;125: 177–180.
- 670 74. O'Donnell S, Baudier K, Marendra DR. Non-Nutritive Polyol Sweeteners Differ in Insecticidal  
671 Activity When Ingested by Adult *Drosophila melanogaster* (Diptera: Drosophilidae). J Insect Sci.  
672 2016;16: 1–3. doi:10.1093/jisesa/iew031
- 673 75. Wu Q, Brown MR. Signaling and Function of Insulin-Like Peptides in Insects. Annu Rev  
674 Entomol. 2006;51: 1–24. doi:10.1146/annurev.ento.51.110104.151011
- 675 76. Das D, Arur S. Conserved insulin signaling in the regulation of oocyte growth, development, and  
676 maturation. Mol Reprod Dev. 2017;84: 444–459. doi:10.1002/mrd.22806
- 677 77. Lu HL, Pietrantonio P V. Insect insulin receptors: Insights from sequence and caste expression  
678 analyses of two cloned hymenopteran insulin receptor cDNAs from the fire ant. Insect Mol Biol.  
679 2011;20: 637–649. doi:10.1111/j.1365-2583.2011.01094.x
- 680 78. De Jong G, Bochdanovits Z. Latitudinal clines in *Drosophila melanogaster*: Body size, allozyme  
681 frequencies, inversion frequencies, and the insulin-signalling pathway. J Genet. 2003;82: 207–223.  
682 doi:10.1007/BF02715819
- 683 79. Xu HJ, Xue J, Lu B, Zhang XC, Zhuo JC, He SF, et al. Two insulin receptors determine  
684 alternative wing morphs in planthoppers. Nature. 2015;519: 464–467. doi:10.1038/nature14286
- 685 80. Lin X, Yao Y, Wang B, Emlen DJ, Lavine LC. Ecological trade-offs between migration and

686 reproduction are mediated by the nutrition-sensitive insulin-signaling pathway. *Int J Biol Sci.*  
687 2016;12: 607–616. doi:10.7150/ijbs.14802

688 81. Wheeler DE, Buck N, Evans JD. Expression of insulin pathway genes during the period of caste  
689 determination in the honey bee, *Apis mellifera*. *Insect Mol Biol.* 2006;15: 597–602.  
690 doi:10.1111/j.1365-2583.2006.00681.x

691

## 692 **Supplementary Information**

693 **S1 Fig.** Linear regressions showing effect of emergence day on thorax length in males and  
694 females at each concentration. Only 0.4M-males saw a significant decreasing in thorax length as  
695 eclosion was more delayed ( $y=-0.0029x+0.9777$ ;  $F=10.51$ ,  $p=0.002$ ,  $R^2=0.1534$ ); slopes were not  
696 significantly different from one another ( $F=0.5298$ ,  $p=0.7537$ ). Error bars represent one standard  
697 deviation.

698 **S2 Fig.** Time from pupation to eclosion did not differ between control and any mannitol  
699 treatments (ANOVA,  $F=1.04$ ,  $p=0.39$ ). Error bars represent one standard deviation.

700 **S3 Fig.** Survival plots showing percent survival to eclosion versus post-hatching fly age given  
701 control food or foods with increasing concentrations of mannitol (0.2M to 0.8M). Observations  
702 were terminated at 27 days after egg laying ( $n=30$ eggs/treatment). Highly significant differences  
703 ( $p<0.01$ ) from the control are in black, non-significant differences are in grey.

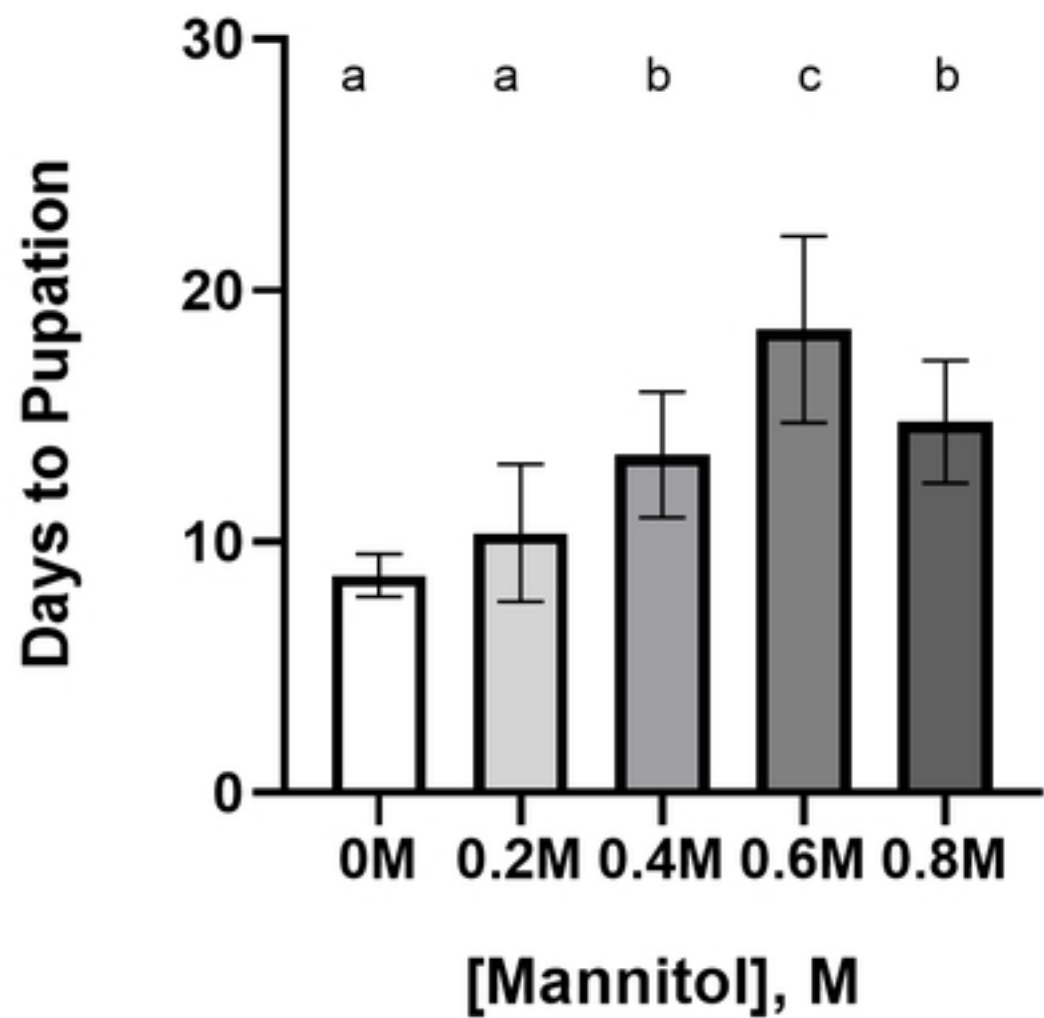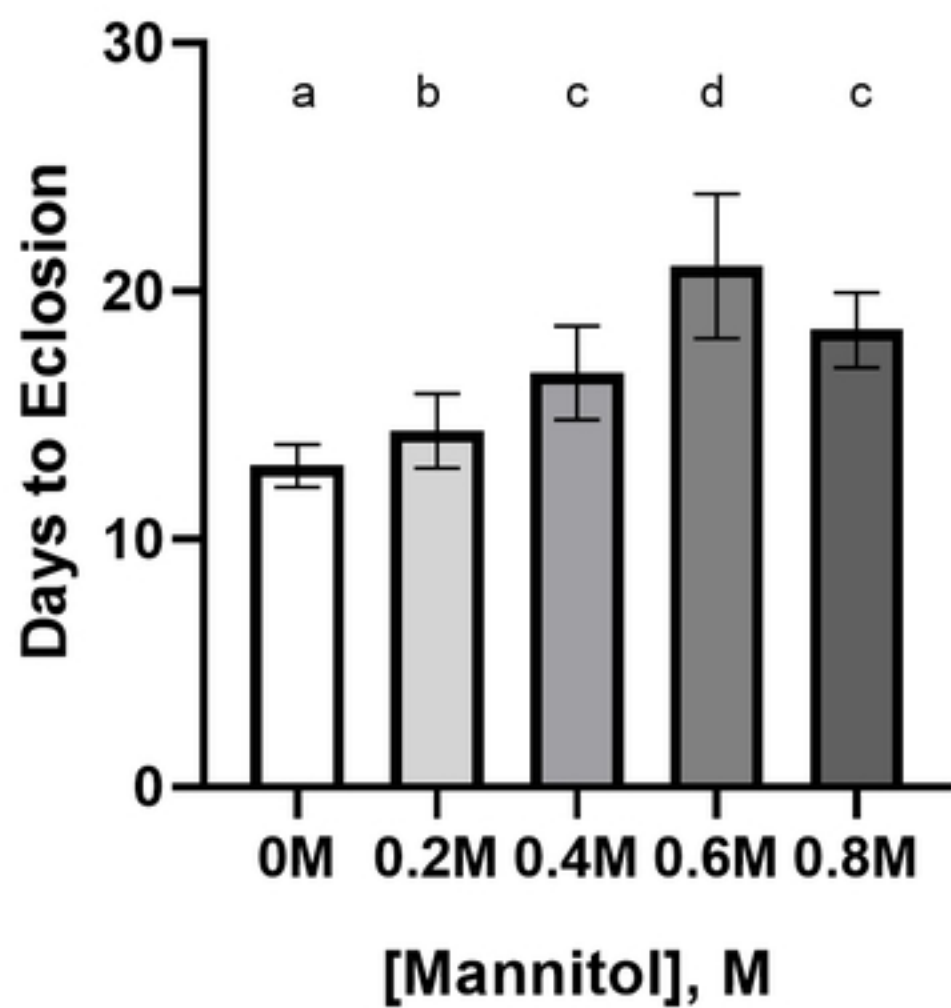

Figure 2

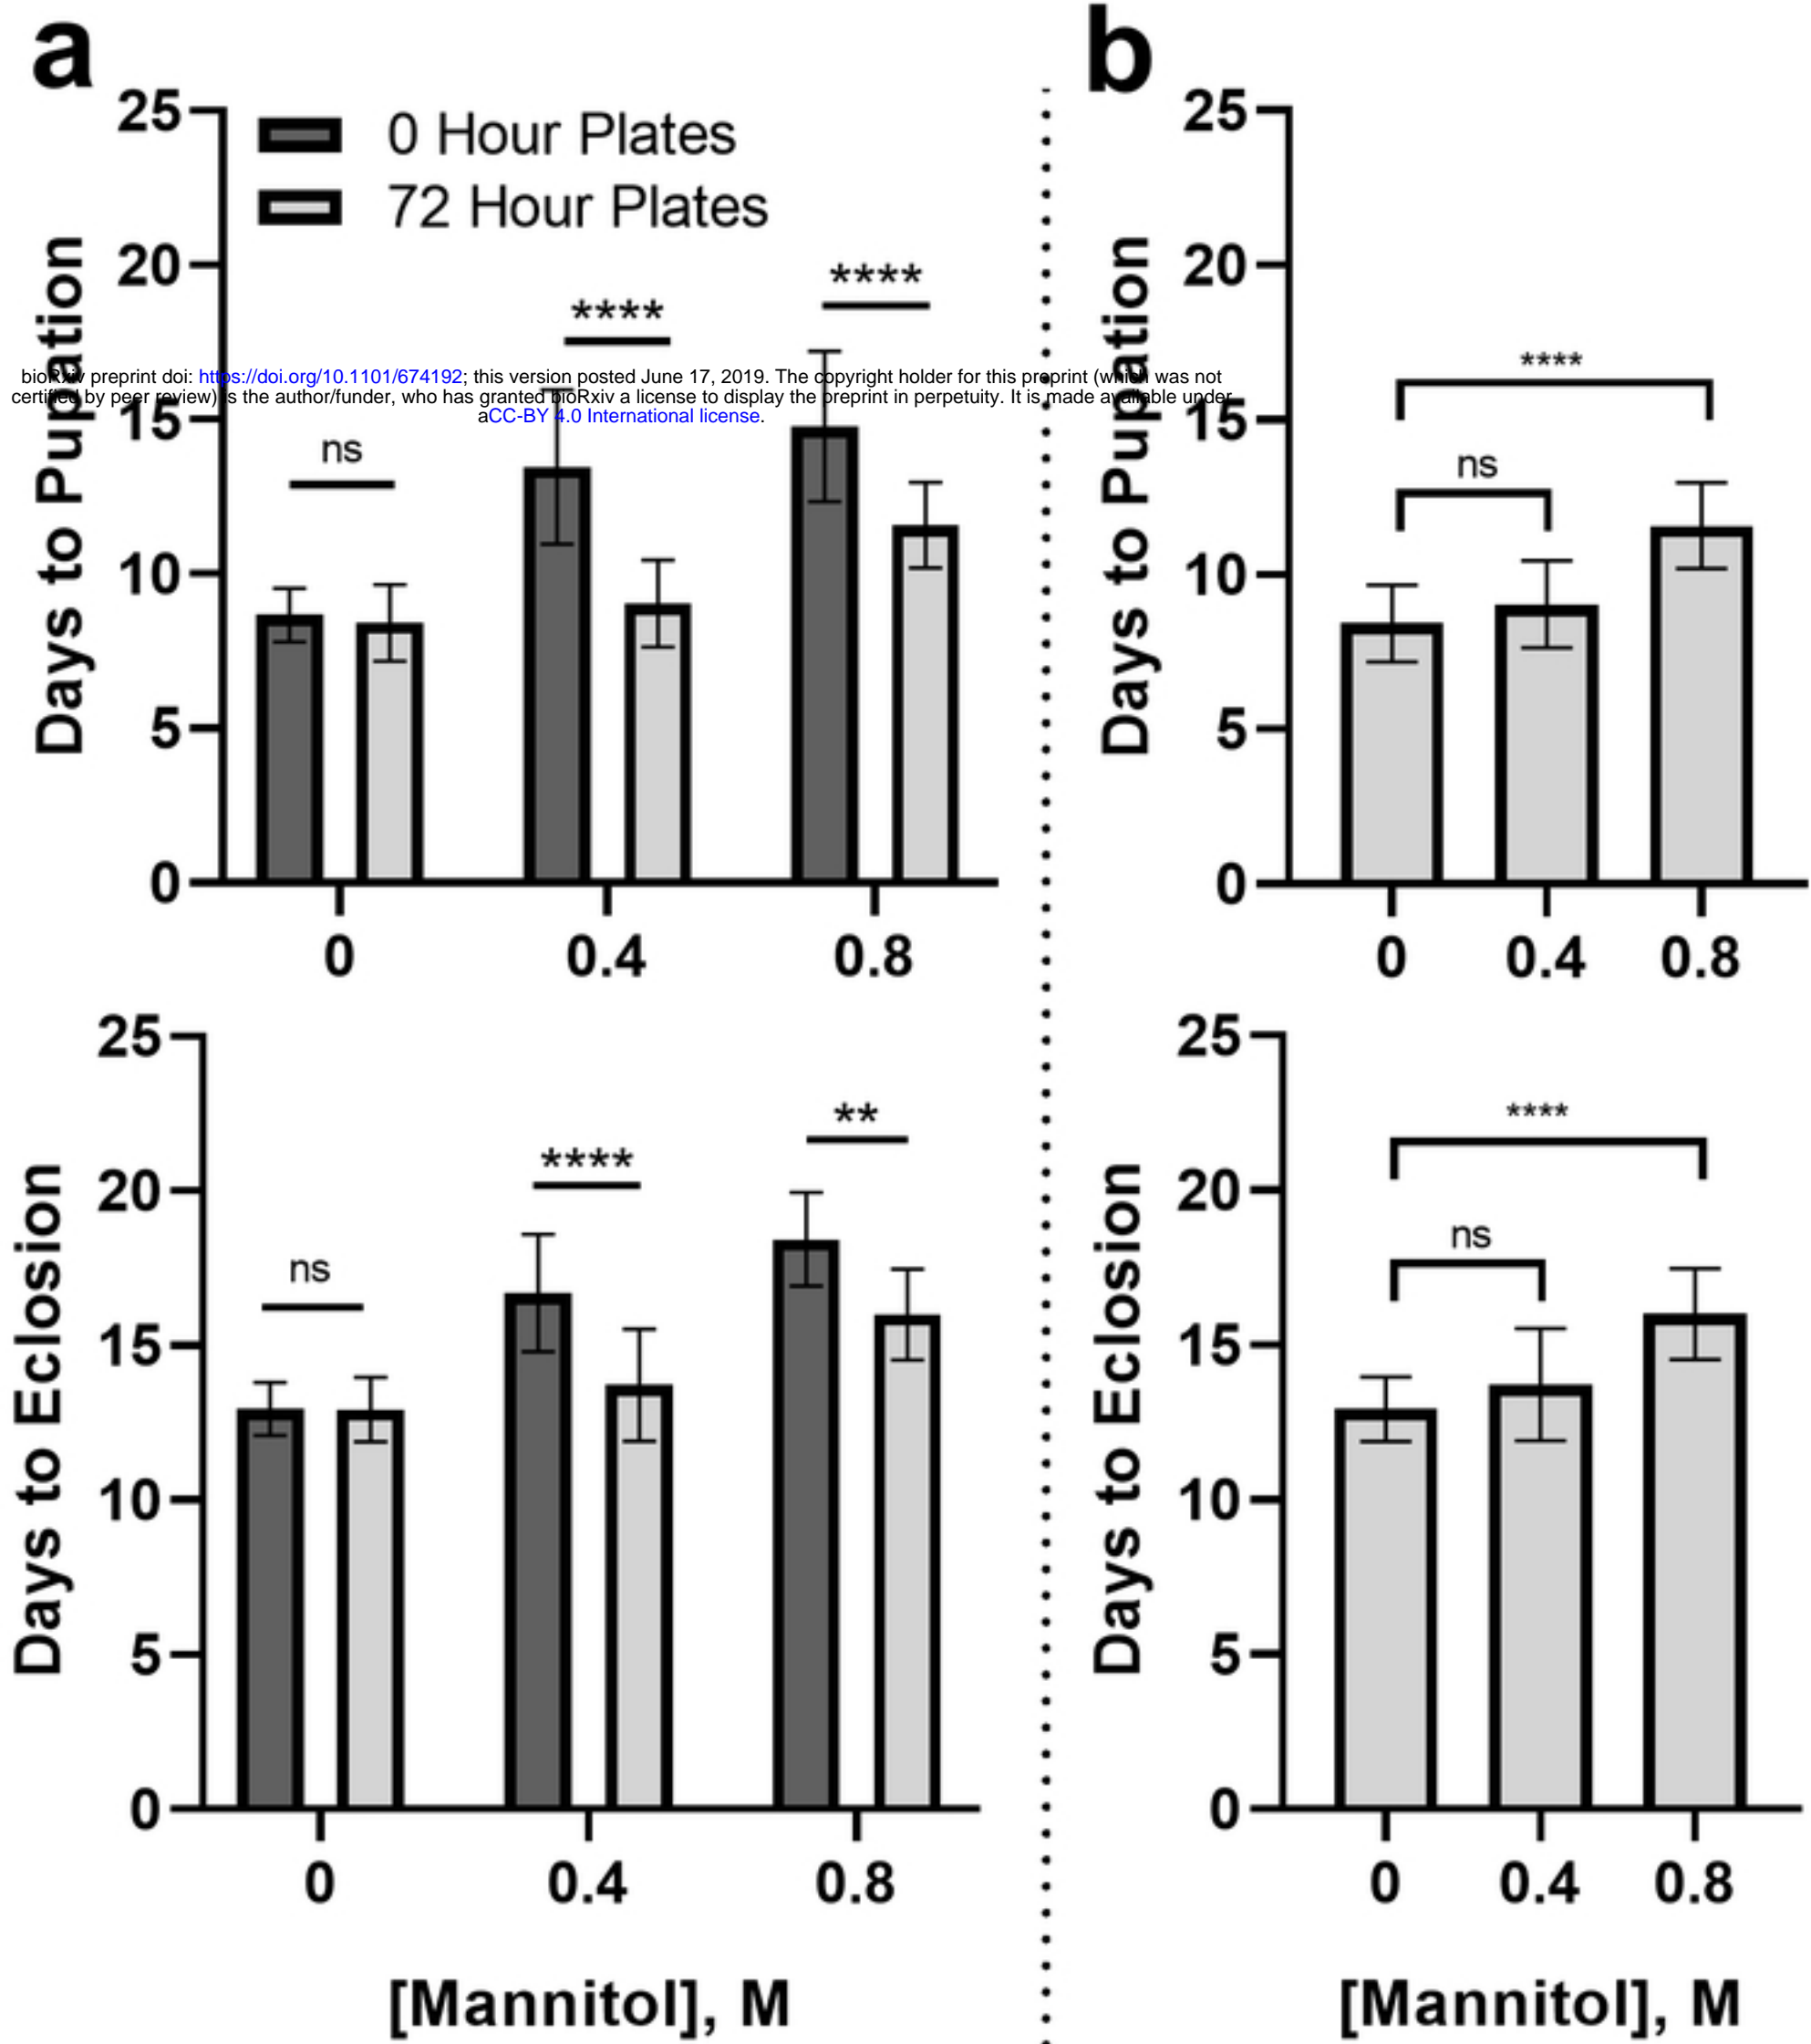

Figure 4

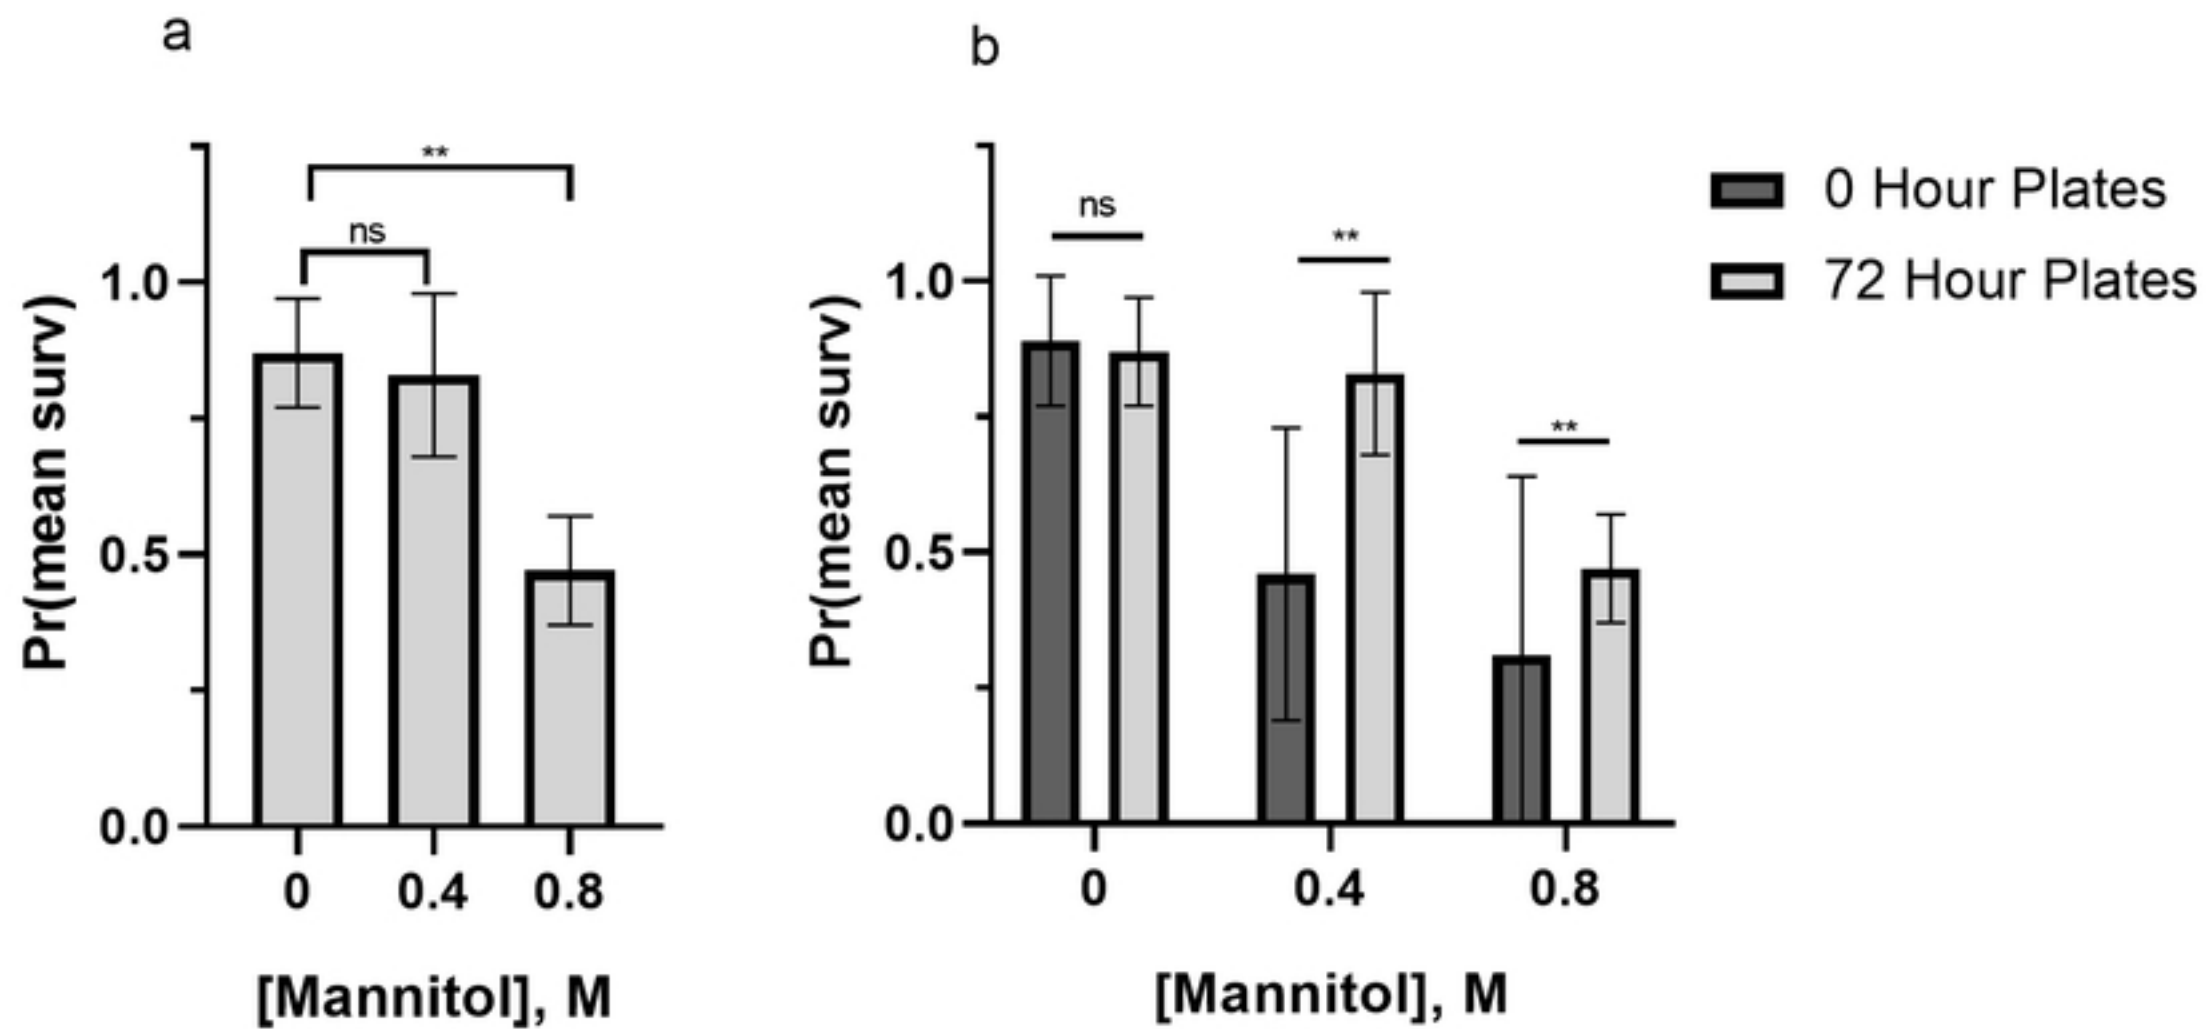

Figure 5

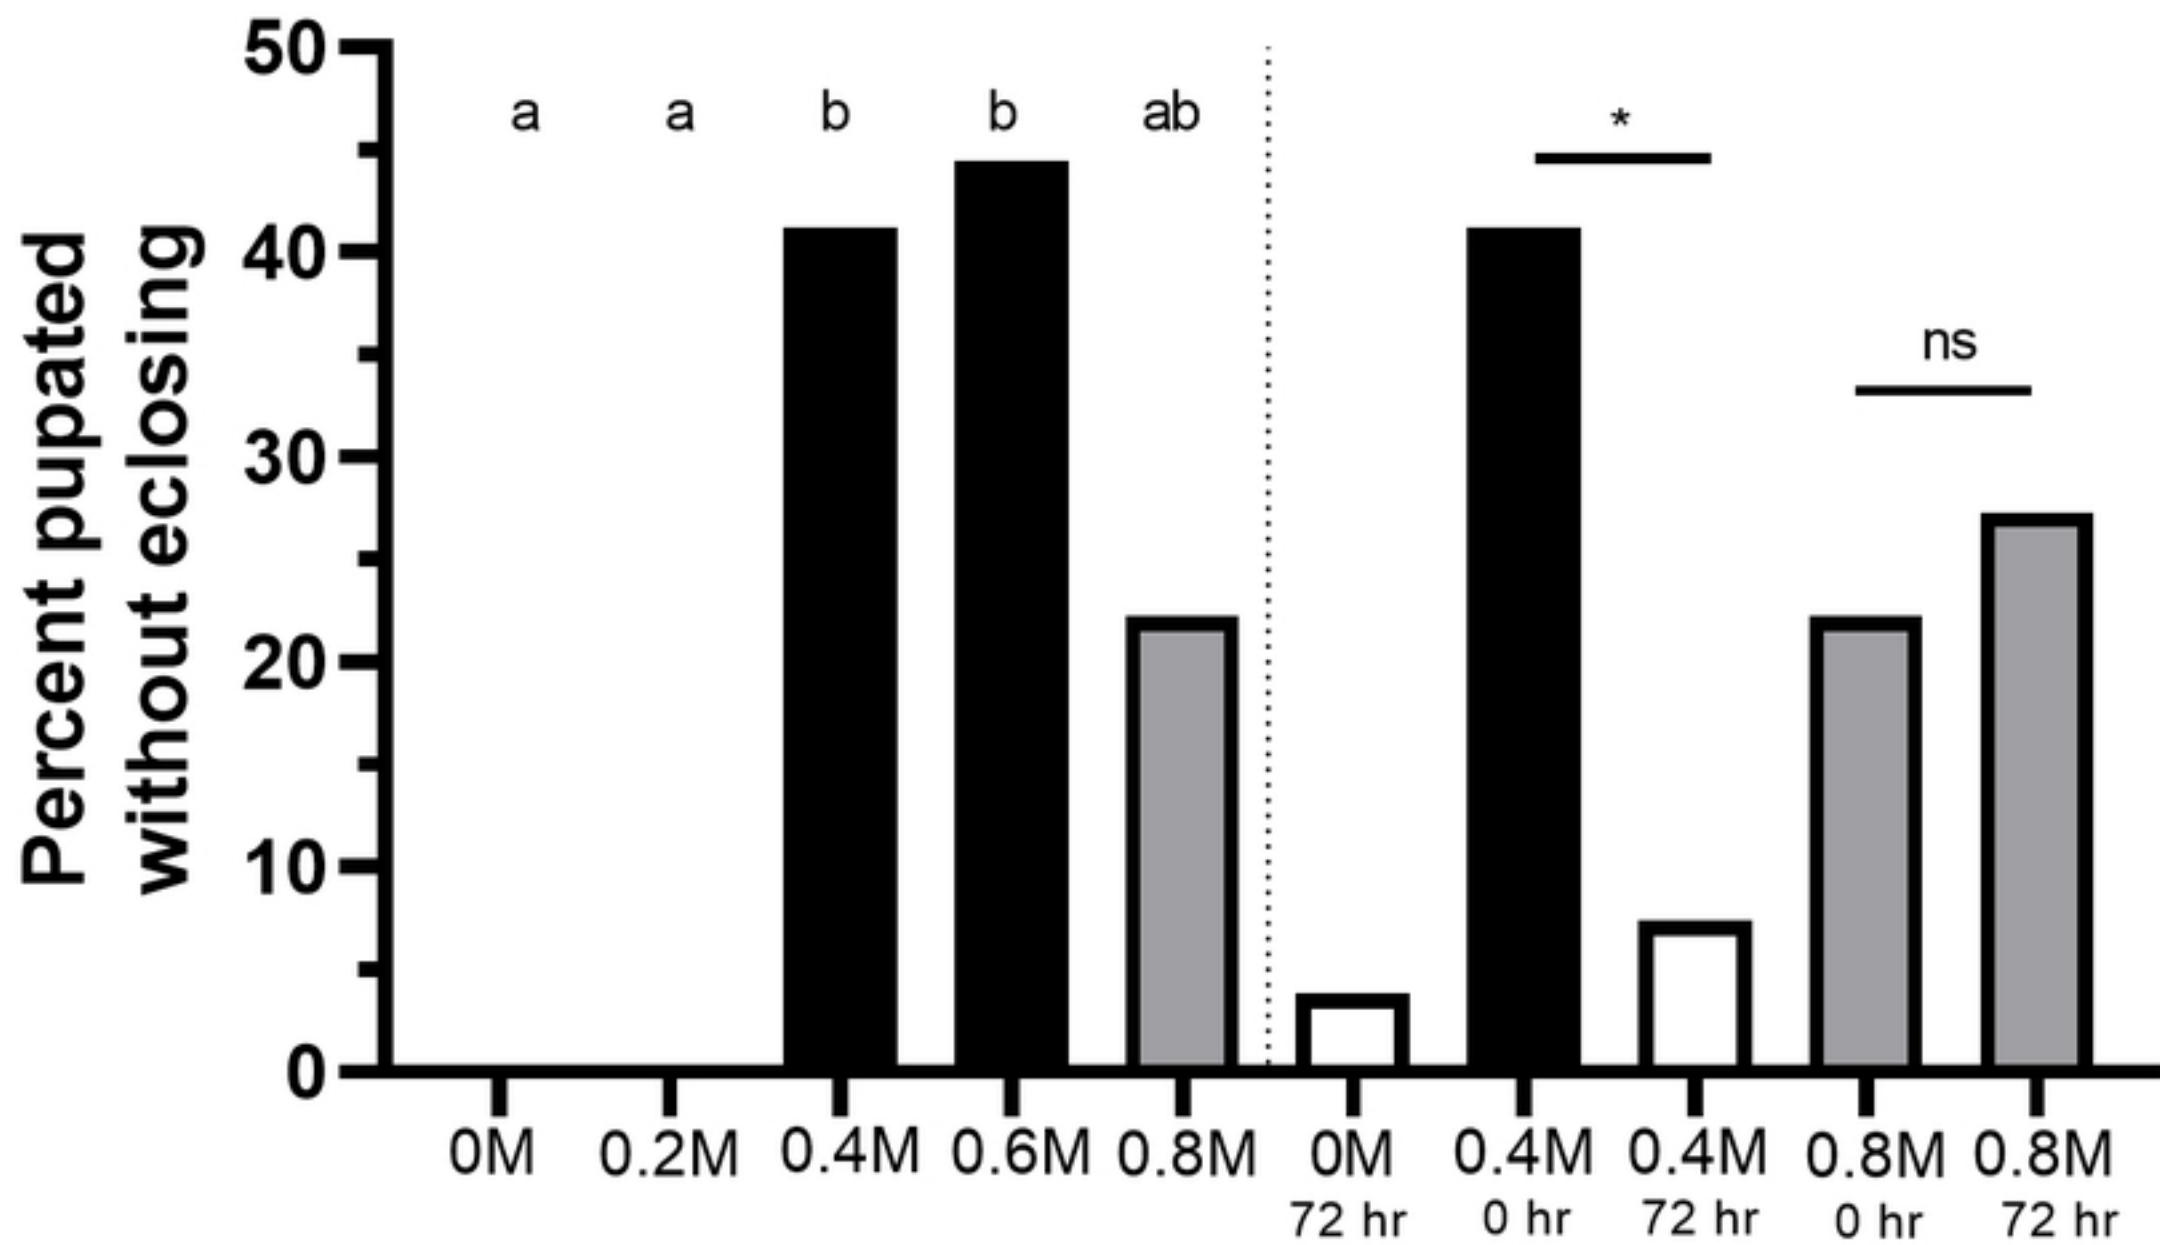

Figure 6



bioRxiv preprint doi: <https://doi.org/10.1101/674192>; this version posted June 17, 2019. The copyright holder for this preprint (which was not certified by peer review) is the author/funder, who has granted bioRxiv a license to display the preprint in perpetuity. It is made available under aCC-BY 4.0 International license.

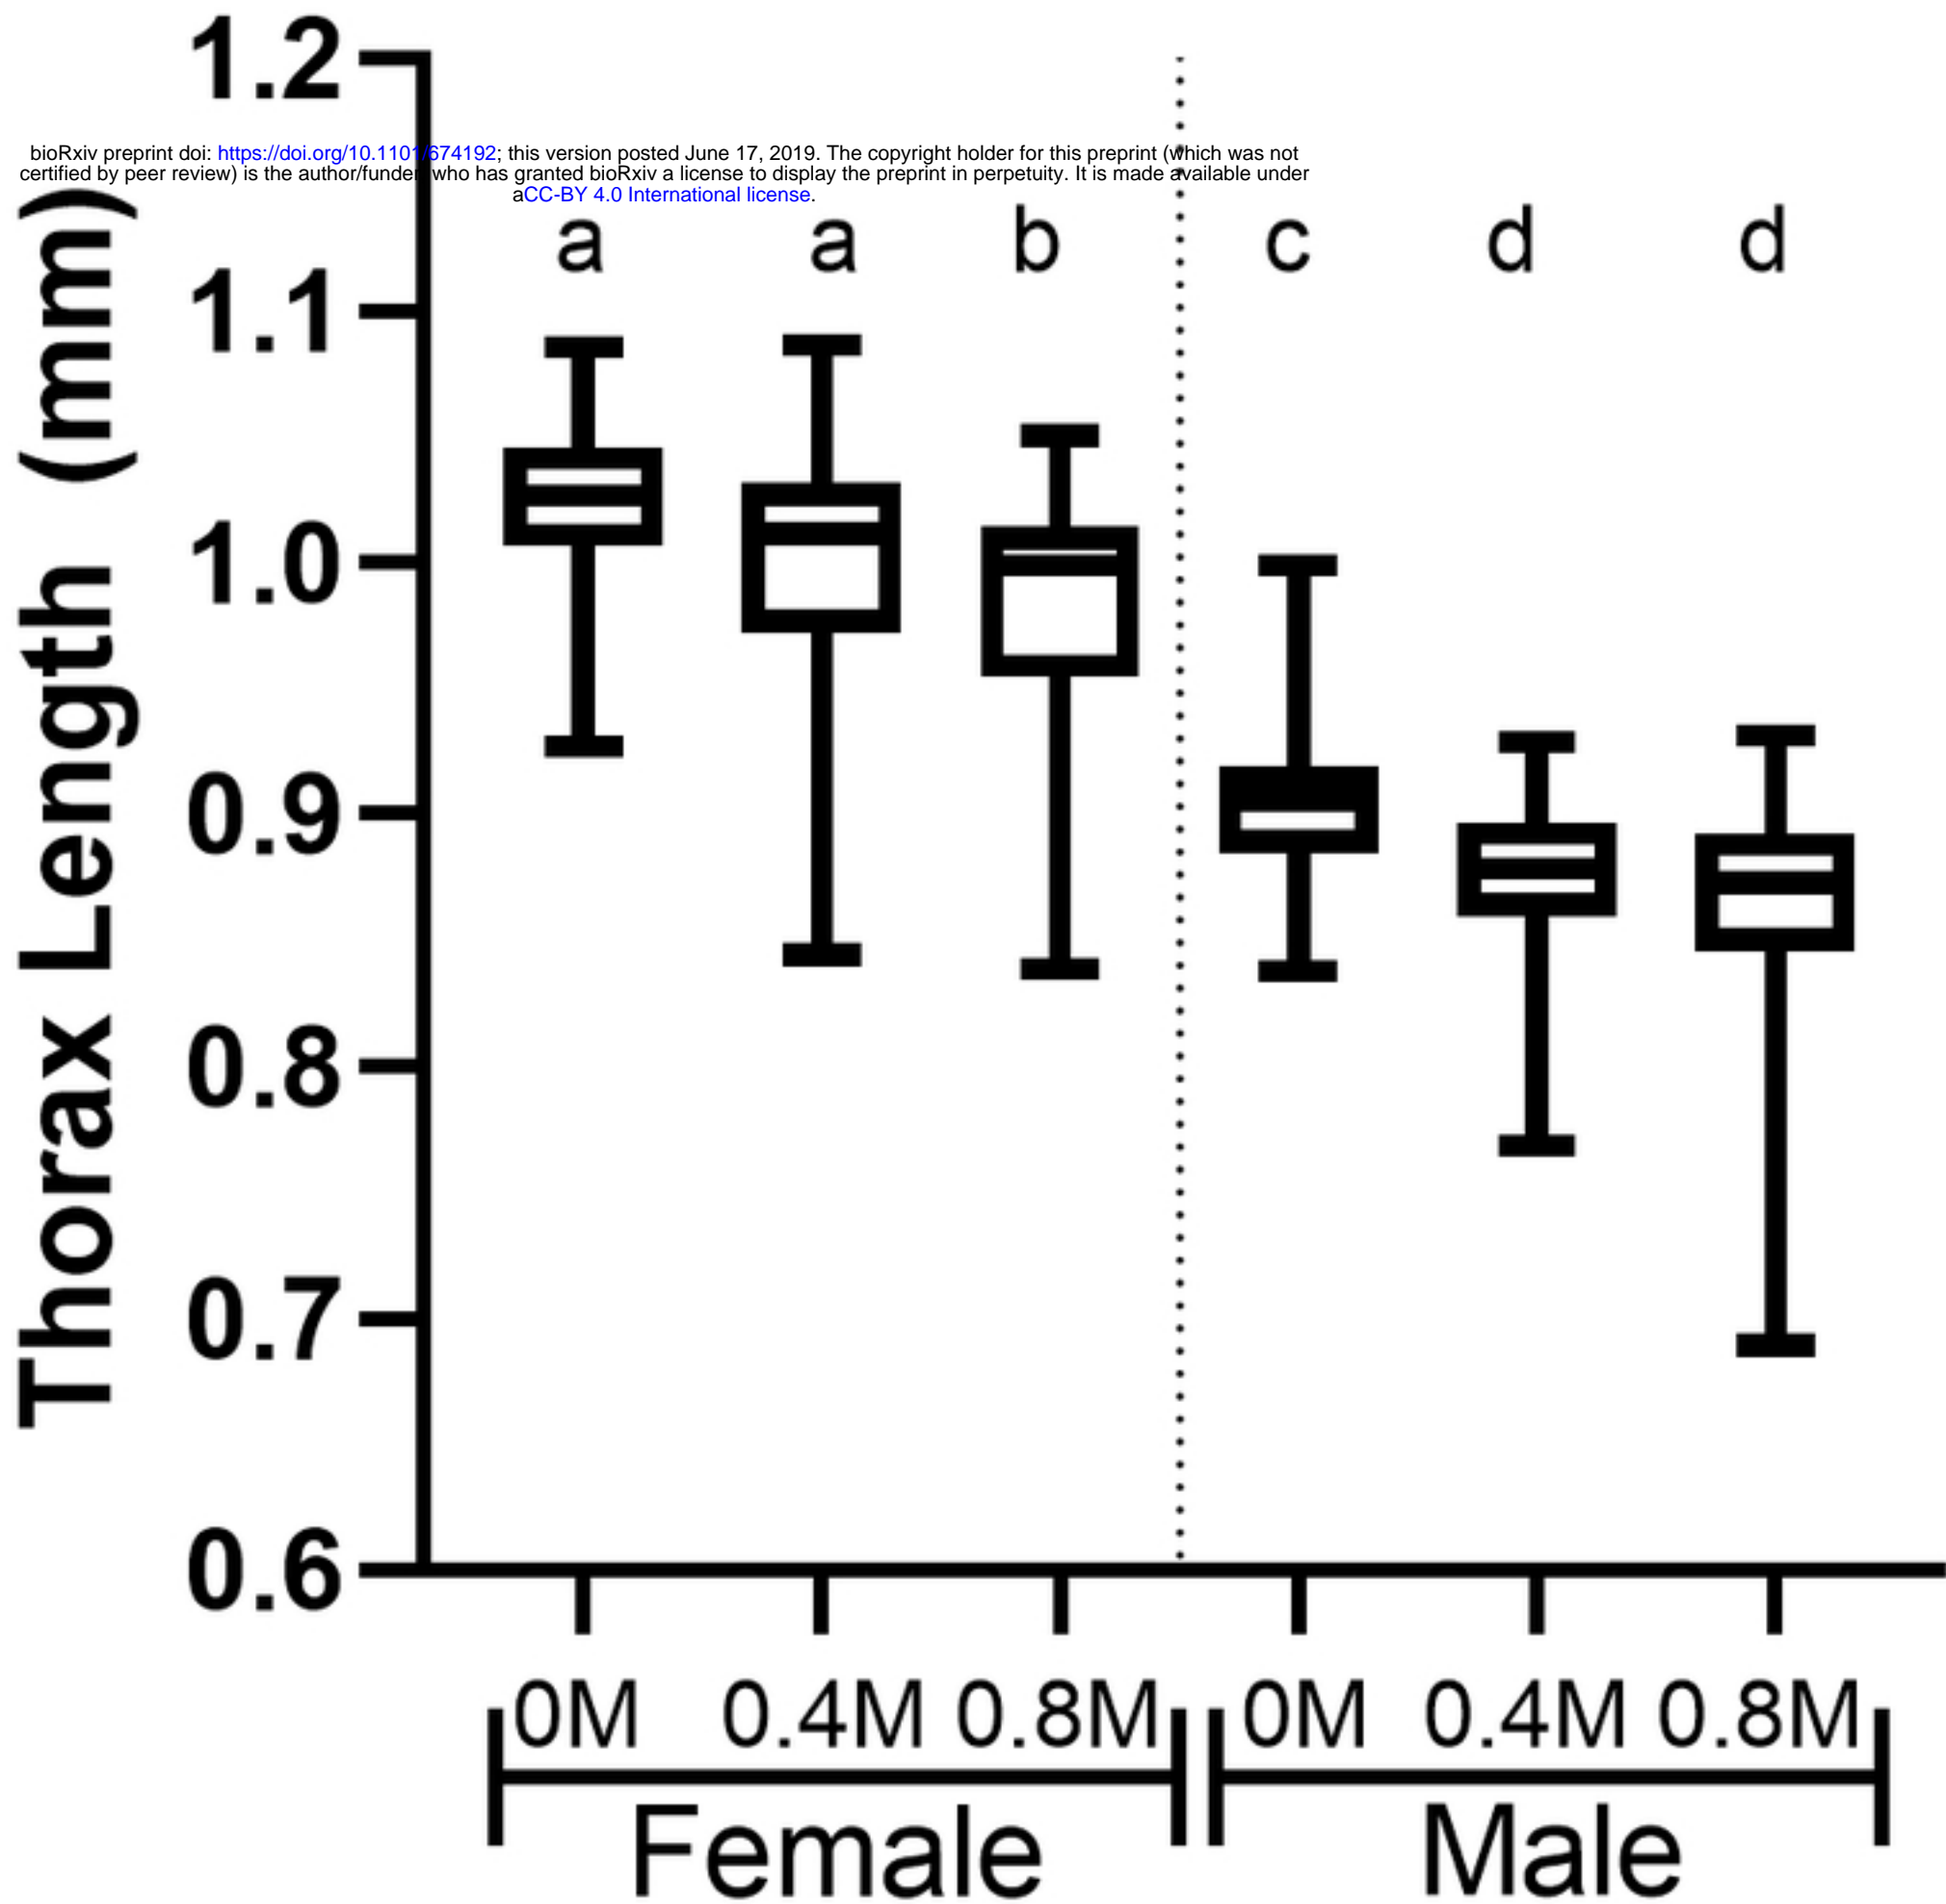

Figure 1

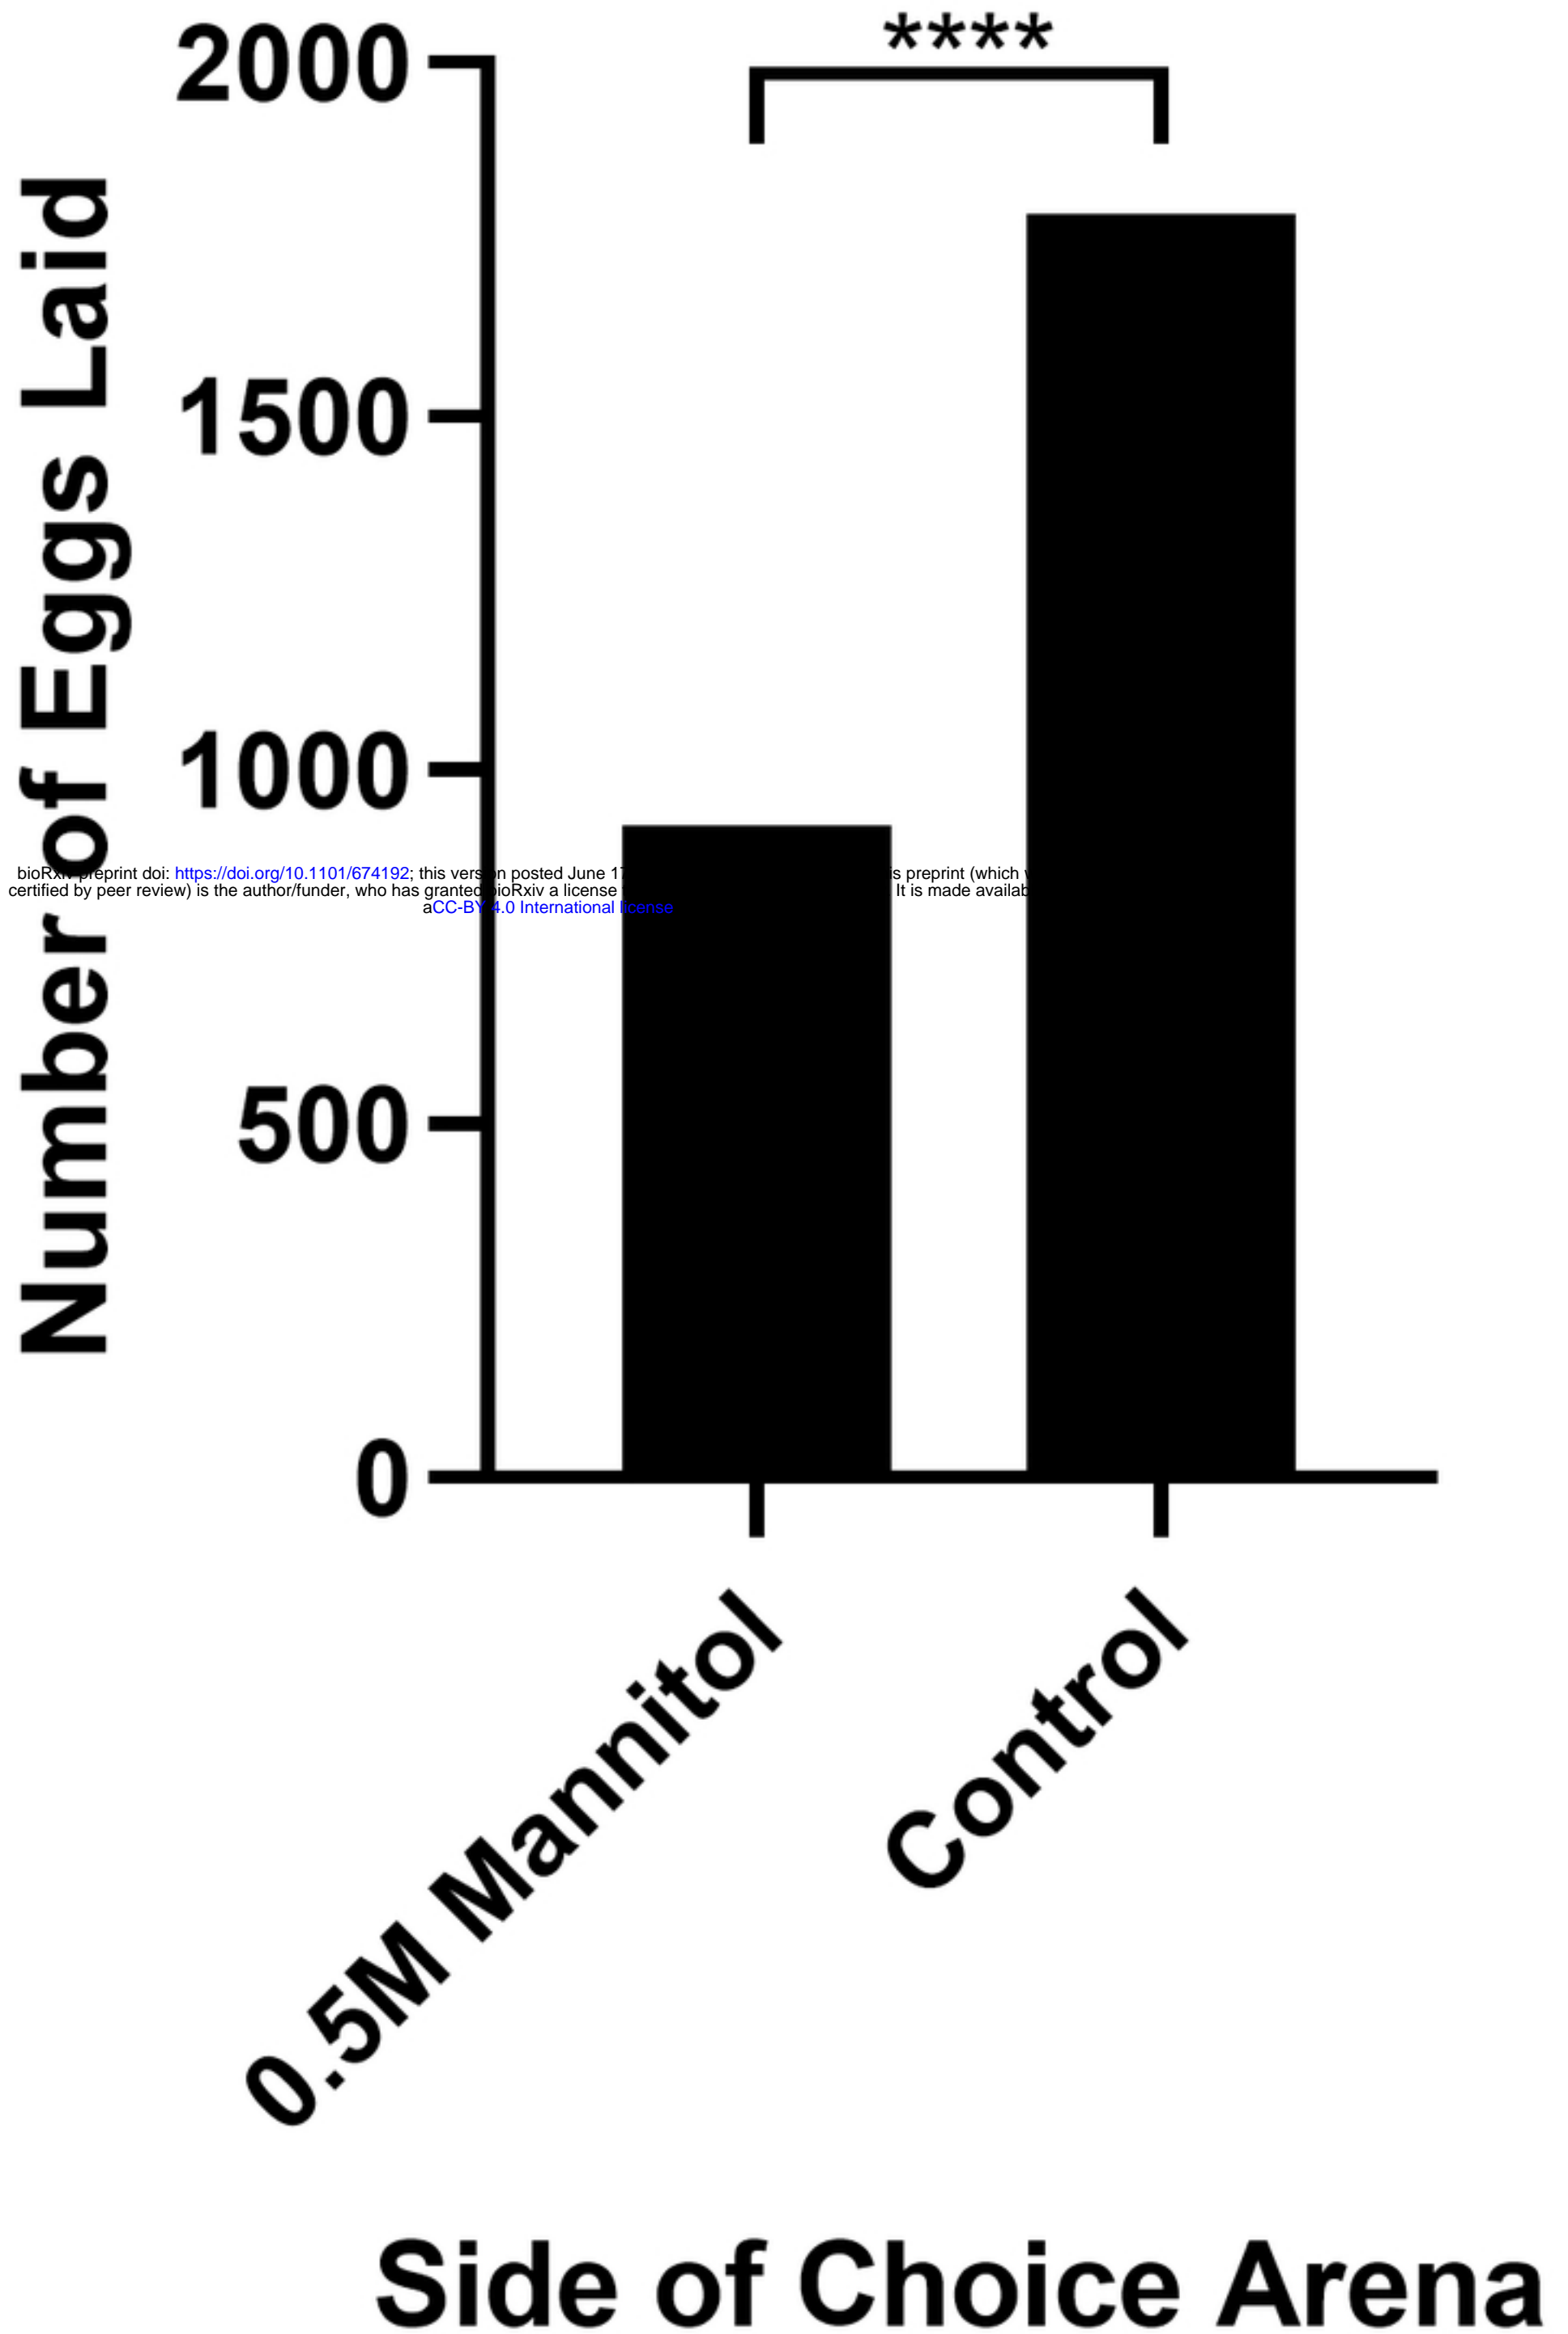

Figure 7

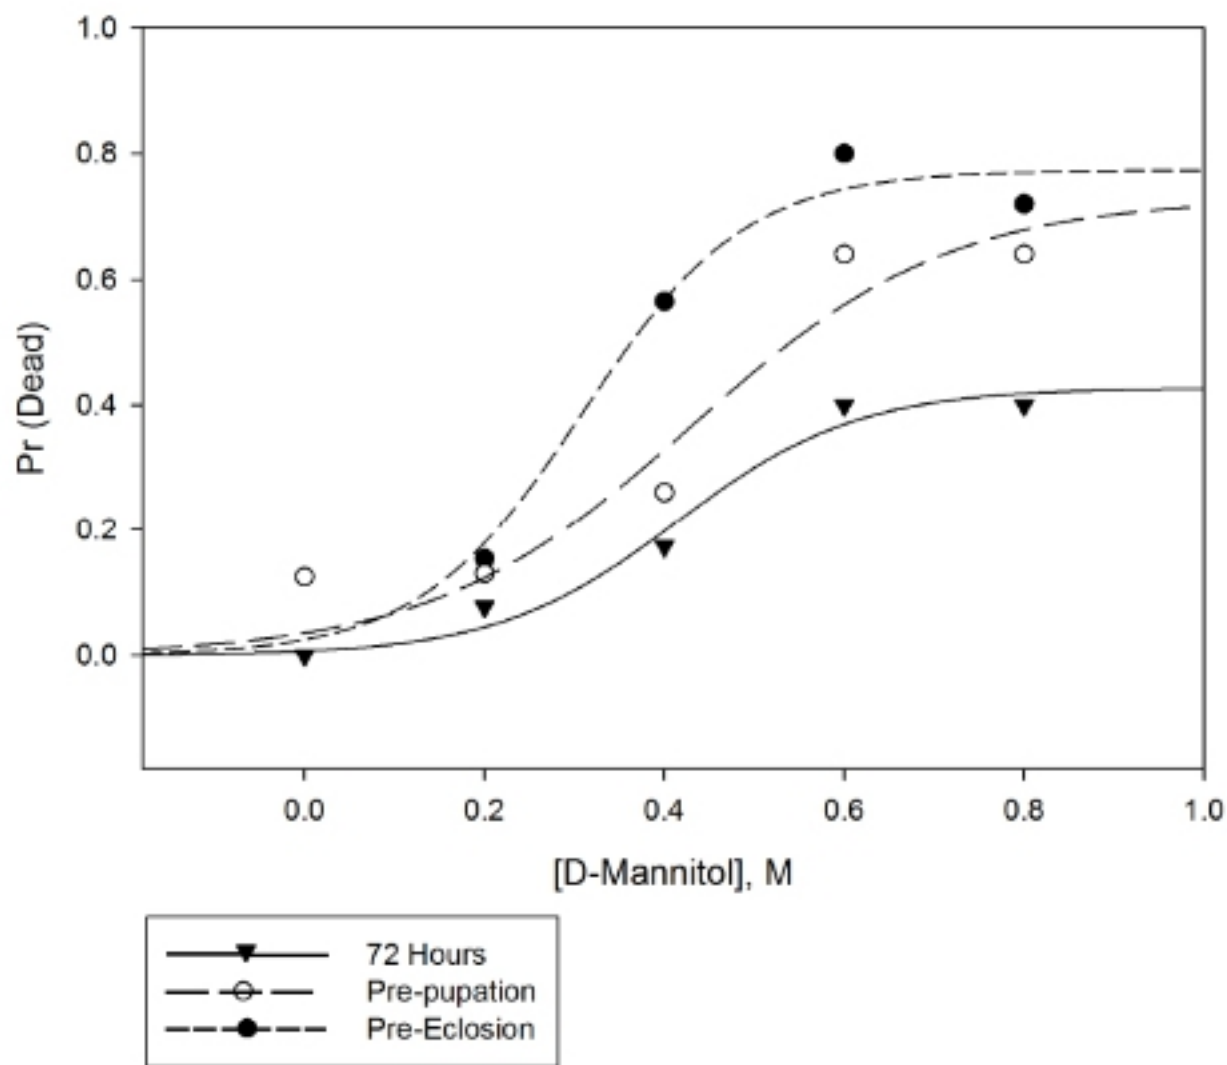

Figure 3
